# Supplementary material for: Discovery and Characterization of SY-1365, a Selective, Covalent Inhibitor of CDK7
Source: Oxford University Press journal article supplement (doi:10.1158/0008-5472.can-19-0119), 2019-05-07
Supplement: 00085472can190119-sup-215142_2_supp_5471484_pqktd4.xlsx [file 00085472can190119-sup-215142_2_supp_5471484_pqktd4.xlsx]

## Sheet: all_drugs_and_CDK7as_GSEA_react
Supplementary Table 5. P-values for enrichment of genes downregulated by treatment with transcriptional inhibitors in THP1 cells or by an analog sensitive mutant of CDK7 in HCT116 cells within 1208 pathways from the REACTOME database. P-values were computed using Gene Set Enrichment Analysis (GSEA).
Pathways	SY1365 pvalue	JQ1 pvalue	FLAVO pvalue	NVP2 pvalue	HCT116 CDK7as pvalue
Cell Cycle, Mitotic	1.56577e-07	0.999808	9.21655e-06	0.000237819	3.10862e-15
Activation of the pre-replicative complex	6.28963e-07	0.207145	0.000255552	0.00858753	2.16078e-06
DNA strand elongation	3.02461e-06	0.0303327	0.00399674	0.0113059	1.27697e-05
Resolution of D-loop Structures through Synthesis-Dependent Strand Annealing (SDSA)	7.32895e-06	0.583585	0.0219466	0.0551595	0.000724895
HDR through Homologous Recombination (HRR)	7.72447e-06	0.900534	0.0168114	0.0155488	8.64414e-05
Mitotic Prometaphase	1.70807e-05	0.992218	0.00256213	0.0139116	3.3513e-05
DNA Double-Strand Break Repair	1.91816e-05	0.993559	0.0593605	0.0664124	4.86235e-09
Resolution of D-loop Structures through Holliday Junction Intermediates	2.24874e-05	0.533217	0.0189443	0.0659654	0.0012382
Resolution of D-Loop Structures	2.31411e-05	0.532692	0.0185193	0.066139	0.000890278
Homologous DNA Pairing and Strand Exchange	3.0651e-05	0.898897	0.0107633	0.0136924	0.000260085
Homology Directed Repair	5.66925e-05	0.994137	0.0630281	0.052044	6.05657e-09
Activation of ATR in response to replication stress	6.58055e-05	0.648909	0.000263339	0.00905408	1.35217e-06
Resolution of Sister Chromatid Cohesion	8.26185e-05	0.896186	5.61138e-05	0.000520331	0.000658267
Amplification of signal from the kinetochores	8.31512e-05	0.885009	2.02849e-05	0.000707336	0.00276103
Amplification of signal from unattached kinetochores via a MAD2 inhibitory signal	9.73107e-05	0.883655	2.2139e-05	0.000726015	0.00273161
Presynaptic phase of homologous DNA pairing and strand exchange	0.000102437	0.892758	0.00692062	0.00623341	0.000430496
Cell Cycle Checkpoints	0.000112258	0.999459	0.000117809	0.000861204	2.56395e-09
HDR through Homologous Recombination (HR) or Single Strand Annealing (SSA)	0.000157227	0.994008	0.0901366	0.0558372	2.72894e-08
rRNA processing	0.000372191	0.00302124	7.41971e-05	0.000331079	0.0020832
Transport of Mature Transcript to Cytoplasm	0.000418706	0.889047	0.00420354	0.0439827	0.00977231
Unwinding of DNA	0.000460202	0.0140651	0.0246215	0.0803574	0.000313756
rRNA processing in the nucleus and cytosol	0.000538203	0.00414541	0.000149661	0.000649105	0.00230286
Major pathway of rRNA processing in the nucleolus and cytosol	0.000658087	0.0109583	0.000579517	0.00126038	0.00411773
S Phase	0.000743842	0.583084	0.0635019	0.0248728	5.05729e-05
G1/S Transition	0.000793408	0.723498	0.0220797	0.0183955	0.000197226
Mitotic G1-G1/S phases	0.00100368	0.797298	0.0104199	0.0243195	0.000369638
DNA Replication	0.00102241	0.414585	0.0177957	0.0137459	1.65833e-05
Transport of Mature mRNA derived from an Intron-Containing Transcript	0.00114153	0.841428	0.0105067	0.0590876	0.0116515
Mitotic Spindle Checkpoint	0.00122693	0.86527	5.04004e-05	0.00139492	0.0020734
HDR through Single Strand Annealing (SSA)	0.00138696	0.905574	0.00965111	0.0260661	0.00443424
G0 and Early G1	0.00193682	0.272517	0.0383417	0.063301	0.00796464
Transcriptional Regulation by E2F6	0.00195252	0.972061	0.0189871	0.113125	0.0105829
tRNA processing	0.00206401	0.0183391	0.00755756	0.00740177	0.0615747
Polymerase switching	0.00212338	0.250682	0.0261554	0.0301678	0.00159659
Polymerase switching on the C-strand of the telomere	0.00222136	0.251051	0.0265857	0.0300033	0.00155606
Leading Strand Synthesis	0.00223451	0.250886	0.0264556	0.0302651	0.00160015
Lagging Strand Synthesis	0.0024119	0.442789	0.0287526	0.0335454	0.00148362
snRNP Assembly	0.00259708	0.0907835	0.0081248	0.00585196	0.00288583
rRNA modification in the nucleus and cytosol	0.0026064	0.00399849	0.000304203	0.0042899	0.00444914
Non-coding RNA Metabolism	0.00264354	0.0911591	0.00822446	0.00572419	0.00281714
tRNA processing in the nucleus	0.00264757	0.0910321	0.00274736	0.00673648	0.25645
Extension of Telomeres	0.00294874	0.182788	0.213963	0.123601	0.000100069
CDC6 association with the ORC:origin complex	0.00297218	0.544135	0.00893571	0.0983087	0.00573344
TP53 Regulates Transcription of Cell Cycle Genes	0.00334268	0.990331	0.00152004	0.0626018	0.00790922
DNA Repair	0.00354507	0.999751	0.0638603	0.0893721	1.82721e-08
Telomere C-strand (Lagging Strand) Synthesis	0.00372419	0.375493	0.0752727	0.0610567	0.000188624
Processing of Capped Intron-Containing Pre-mRNA	0.00396996	0.999831	0.00438463	0.0513418	0.00209299
Synthesis of DNA	0.00416079	0.413243	0.0520733	0.0321043	9.8974e-05
ATF4 activates genes	0.00420705	0.310524	0.047274	0.0593155	0.0195942
PERK regulates gene expression	0.00431269	0.421261	0.0115436	0.020614	0.0232015
SUMOylation	0.00448694	0.997148	0.289917	0.593768	0.0160571
Transcriptional regulation by the AP-2 (TFAP2) family of transcription factors	0.00475979	0.149639	0.0970872	0.0607633	0.0550839
Chromosome Maintenance	0.0049989	0.994092	0.164254	0.23887	3.84767e-09
M Phase	0.00504822	0.999966	0.00279323	0.0506419	6.72111e-10
G1/S-Specific Transcription	0.00505758	0.781054	0.00592578	0.0194691	0.00275228
Activation of E2F1 target genes at G1/S	0.00507738	0.782164	0.00606076	0.0195879	0.00285747
Biosynthesis of the N-glycan precursor (dolichol lipid-linked oligosaccharide, LLO) and transfer to a nascent protein	0.00538152	0.165356	0.307344	0.198579	0.579741
RHO GTPases Activate Formins	0.00597031	0.932808	0.0122546	0.0603325	0.00810738
E2F mediated regulation of DNA replication	0.00785284	0.788795	0.00948633	0.0368227	0.00516154
Collagen chain trimerization	0.00841721	0.00667009	0.96618	0.972405	0.862172
Mitotic Metaphase and Anaphase	0.00886706	0.970548	0.00292428	0.0403202	0.00911154
TP53 Regulates Transcription of Genes Involved in G1 Cell Cycle Arrest	0.00910547	0.73337	0.0558916	0.0727837	0.00459845
SUMO E3 ligases SUMOylate target proteins	0.00944992	0.993859	0.413819	0.787999	0.011302
Mitotic Anaphase	0.0100586	0.963611	0.0034202	0.0435064	0.010188
Transport of Mature mRNAs Derived from Intronless Transcripts	0.0101126	0.641565	0.0110982	0.0300242	0.0452026
Processive synthesis on the lagging strand	0.0101269	0.498393	0.0217493	0.0492162	0.0050158
Removal of the Flap Intermediate	0.0105951	0.499841	0.0214918	0.0480821	0.0050568
Cleavage of Growing Transcript in the Termination Region	0.0123805	0.904133	0.216769	0.162569	0.0919733
SUMOylation of DNA replication proteins	0.012422	0.766619	0.0559273	0.0874401	0.00549049
RNA Polymerase II Transcription Termination	0.0127642	0.902914	0.217769	0.163091	0.092531
Transport of Mature mRNA Derived from an Intronless Transcript	0.0131876	0.564437	0.0177438	0.0388666	0.0497614
mRNA 3'-end processing	0.0135757	0.942444	0.121053	0.167062	0.122304
Synthesis of substrates in N-glycan biosythesis	0.0141152	0.390983	0.108588	0.207088	0.880835
Nucleobase biosynthesis	0.0141541	0.127264	0.298937	0.424834	0.0747996
Cyclin A/B1/B2 associated events during G2/M transition	0.0145464	0.68069	0.00122985	0.0266105	0.0113657
MMR	0.0146038	0.84653	0.057971	0.0471402	0.0162646
Mitochondrial translation elongation	0.0147502	4.48925e-06	6.91062e-05	3.50141e-05	0.0076423
Vpr-mediated nuclear import of PICs	0.0151068	0.69526	0.0479804	0.0492854	0.0413164
Interactions of Vpr with host cellular proteins	0.0154533	0.694996	0.0481503	0.0489921	0.041964
Mitochondrial translation initiation	0.0157659	1.33886e-05	8.60358e-05	8.50536e-06	0.006851
Recognition of DNA damage by PCNA-containing replication complex	0.0158153	0.743772	0.144766	0.134224	0.00700296
Synthesis of PA	0.0161087	0.12972	0.69036	0.797053	0.75576
Transcription of E2F targets under negative control by DREAM complex	0.0163898	0.161255	0.0535793	0.0377944	0.0905359
Mismatch repair (MMR) directed by MSH2:MSH6 (MutSalpha)	0.0165901	0.768445	0.0680134	0.0604992	0.0176564
Regulation of TP53 Activity through Phosphorylation	0.0166862	0.994278	0.0043764	0.00347675	0.00352643
Separation of Sister Chromatids	0.0172947	0.95879	0.00685834	0.0642777	0.0149786
Transport of the SLBP Dependant Mature mRNA	0.0175082	0.611936	0.00929952	0.0331034	0.0524514
Ligand-dependent caspase activation	0.0191271	0.00769182	0.000415672	0.00743727	0.88139
Mitochondrial translation termination	0.0209915	2.75199e-05	0.000321863	5.19798e-05	0.0153001
Telomere Maintenance	0.0210885	0.989744	0.319368	0.335774	1.34191e-07
PCNA-Dependent Long Patch Base Excision Repair	0.0210994	0.457017	0.111568	0.055335	0.00056712
Gap-filling DNA repair synthesis and ligation in GG-NER	0.0216564	0.397299	0.594111	0.456923	0.00324477
Transport of the SLBP independent Mature mRNA	0.0219637	0.531705	0.0128016	0.0430867	0.0582649
Regulation of Glucokinase by Glucokinase Regulatory Protein	0.0222835	0.489159	0.0233337	0.0384394	0.0438119
Nuclear Pore Complex (NPC) Disassembly	0.0233489	0.369367	0.0215357	0.0547734	0.0400526
Cobalamin (Cbl, vitamin B12) transport and metabolism	0.0243503	0.142297	0.570187	0.334148	0.942651
Import of palmitoyl-CoA into the mitochondrial matrix	0.0263304	0.0880965	0.314334	0.12686	0.311453
Mitochondrial translation	0.0267199	3.32989e-05	0.000341851	6.45374e-05	0.0116284
Acyl chain remodelling of PG	0.0268433	0.294145	0.183485	0.213119	0.145682
Recruitment of NuMA to mitotic centrosomes	0.027052	0.979891	0.090516	0.484514	0.00625237
Resolution of Abasic Sites (AP sites)	0.0276752	0.279749	0.31681	0.124564	0.000390579
Base Excision Repair	0.0279329	0.280946	0.319419	0.124913	0.000399006
Nucleotide metabolism	0.0309046	0.0113094	0.804186	0.890544	0.0702211
TP53 Regulates Transcription of Caspase Activators and Caspases	0.031142	0.0332188	0.261839	0.163423	0.402608
Nuclear import of Rev protein	0.0312076	0.484757	0.0835595	0.104459	0.0155042
NS1 Mediated Effects on Host Pathways	0.0315447	0.742771	0.00979163	0.0228425	0.0617195
KSRP (KHSRP) binds and destabilizes mRNA	0.0315772	0.234639	0.49325	0.342809	0.0965528
Host Interactions with Influenza Factors	0.0316723	0.742385	0.00982805	0.0229685	0.0617295
Export of Viral Ribonucleoproteins from Nucleus	0.0324194	0.522331	0.0430328	0.135194	0.0417581
RNA Polymerase III Transcription Initiation From Type 2 Promoter	0.0329506	0.225992	0.0345368	0.0432298	0.0321155
NEP/NS2 Interacts with the Cellular Export Machinery	0.033001	0.521754	0.0415221	0.131651	0.0412129
AURKA Activation by TPX2	0.0339002	0.968524	0.0516589	0.457617	0.00503978
Recruitment of mitotic centrosome proteins and complexes	0.0339581	0.981494	0.0968337	0.499184	0.00790056
M/G1 Transition	0.0341349	0.548724	0.0513089	0.0282829	0.000954246
Centrosome maturation	0.0342386	0.981353	0.0963605	0.497706	0.00754581
DNA Replication Pre-Initiation	0.0343752	0.550983	0.0513715	0.0283658	0.000931922
Processing of DNA double-strand break ends	0.0345312	0.99476	0.397079	0.277579	3.8382e-07
Cilium Assembly	0.0345411	0.99688	0.350848	0.718744	0.975706
Nuclear Envelope Breakdown	0.0347354	0.654568	0.005682	0.0534327	0.0371165
G2/M DNA damage checkpoint	0.0350105	0.996435	0.238313	0.261224	7.38215e-07
SUMOylation of DNA damage response and repair proteins	0.0357494	0.975496	0.208092	0.557768	0.0324519
mRNA decay by 3' to 5' exoribonuclease	0.0367672	0.0559564	0.557082	0.265283	0.165609
G2/M Checkpoints	0.0378494	0.999145	0.0207921	0.0330712	1.27335e-06
Amino acid and oligopeptide SLC transporters	0.0381828	0.00180914	0.285687	0.380355	0.231027
Transcription of E2F targets under negative control by p107 (RBL1) and p130 (RBL2) in complex with HDAC1	0.0390388	0.622656	0.3528	0.490314	0.171587
Cytosolic sensors of pathogen-associated DNA	0.0390856	0.317081	0.121547	0.0393913	0.0897932
RNA Polymerase III Chain Elongation	0.0411491	0.249929	0.232524	0.117484	0.0163641
Glucose metabolism	0.041153	0.532205	0.247325	0.168756	0.662457
Inhibition of replication initiation of damaged DNA by RB1/E2F1	0.0412859	0.785786	0.123967	0.0649272	0.0126036
Transport of Ribonucleoproteins into the Host Nucleus	0.0414262	0.563987	0.0332414	0.0421422	0.037852
Resolution of AP sites via the multiple-nucleotide patch replacement pathway	0.0416802	0.429453	0.141476	0.0792496	0.000435789
RNA Polymerase III Transcription Initiation From Type 1 Promoter	0.042614	0.241789	0.0458639	0.0491024	0.033573
Interactions of Rev with host cellular proteins	0.0429001	0.450698	0.0931525	0.189985	0.021837
Rev-mediated nuclear export of HIV RNA	0.0438968	0.4419	0.0554363	0.150122	0.0242754
Removal of the Flap Intermediate from the C-strand	0.0441183	0.698737	0.128219	0.14833	0.0360654
Mitotic G2-G2/M phases	0.0450251	0.999658	0.0152997	0.0683699	0.00457912
Nuclear Envelope Reassembly	0.0453637	0.65145	0.173264	0.334474	0.162157
SUMOylation of RNA binding proteins	0.0463313	0.806431	0.117066	0.209756	0.2208
Mismatch repair (MMR) directed by MSH2:MSH3 (MutSbeta)	0.0466771	0.788552	0.203986	0.0893442	0.0119741
Initiation of Nuclear Envelope Reformation	0.0469126	0.651235	0.173162	0.335316	0.160896
Basigin interactions	0.0472085	0.151784	0.0553053	0.0792566	0.864726
Chemokine receptors bind chemokines	0.0473322	1.99448e-09	7.1139e-05	7.60687e-05	0.105104
G2/M Transition	0.0480781	0.999569	0.0164526	0.0735993	0.00675293
Cytosolic sulfonation of small molecules	0.0494524	0.804935	0.731636	0.676745	0.948681
Anchoring of the basal body to the plasma membrane	0.0497189	0.978458	0.0840723	0.664663	0.0396966
Loss of Nlp from mitotic centrosomes	0.0520895	0.96767	0.0739474	0.56558	0.00834268
Loss of proteins required for interphase microtubule organizationÂ from the centrosome	0.0530684	0.966718	0.0735966	0.565639	0.00853558
Fanconi Anemia Pathway	0.0535259	0.754945	0.248633	0.105914	0.0142144
Dermatan sulfate biosynthesis	0.0536117	0.0194748	0.405775	0.410996	0.560475
Organelle biogenesis and maintenance	0.0576932	0.984906	0.54401	0.901055	0.91437
Metabolism of folate and pterines	0.0600428	0.0801084	0.761779	0.67898	0.125649
Cooperation of PDCL (PhLP1) and TRiC/CCT in G-protein beta folding	0.0620543	0.64279	0.305839	0.37604	0.980322
ATF6 (ATF6-alpha) activates chaperones	0.0621133	0.938906	0.0416091	0.0588127	0.0825488
mRNA Splicing	0.0635336	0.999962	0.0132176	0.20781	0.0137938
Synthesis of glycosylphosphatidylinositol (GPI)	0.0664878	0.0841478	0.198875	0.223178	0.770154
TP53 Regulates Transcription of Genes Involved in G2 Cell Cycle Arrest	0.0670879	0.911942	0.0870039	0.138097	0.100782
CASP8 activity is inhibited	0.0672181	0.0323785	0.0150008	0.0943655	0.854135
Dimerization of procaspase-8	0.0673282	0.0329012	0.0148945	0.0922711	0.854346
Regulation of necroptotic cell death	0.0674479	0.0331943	0.0146563	0.0949126	0.854873
Regulation by c-FLIP	0.0675559	0.0324913	0.0152608	0.0946383	0.853671
Activation of IRF3/IRF7 mediated by TBK1/IKK epsilon	0.0700385	0.126437	0.120116	0.16089	0.931813
RNA Polymerase III Transcription	0.0718905	0.339662	0.0530798	0.207849	0.00722784
RNA Polymerase III Transcription Termination	0.0724711	0.194987	0.270922	0.318417	0.00774786
RNA Polymerase III Abortive And Retractive Initiation	0.0729653	0.34032	0.0540854	0.206706	0.00724141
ATF6 (ATF6-alpha) activates chaperone genes	0.0738102	0.9413	0.032881	0.0793581	0.135856
Regulation of PLK1 Activity at G2/M Transition	0.07419	0.968736	0.124025	0.303399	0.0207384
Sulfur amino acid metabolism	0.0750354	0.943639	0.704692	0.541163	0.597196
Polo-like kinase mediated events	0.0788837	0.630398	0.00400067	0.0144124	0.0170298
Regulation of TP53 Activity	0.0809736	0.996772	0.0126181	0.00472974	0.299584
TICAM1,TRAF6-dependent induction of TAK1 complex	0.0845845	0.428911	0.177278	0.159969	0.896333
IRAK2 mediated activation of TAK1 complex upon TLR7/8 or 9 stimulation	0.0850287	0.428436	0.173944	0.159523	0.896698
Mitochondrial protein import	0.0852432	0.0704968	0.222979	0.516087	0.0179911
Regulated Necrosis	0.0854746	0.0797846	0.0190343	0.114548	0.838555
Regulation of HSF1-mediated heat shock response	0.0861007	0.9904	0.011003	0.0335247	0.182556
RIPK1-mediated regulated necrosis	0.086572	0.0793245	0.0181907	0.114595	0.837663
pre-mRNA splicing	0.0872995	0.999956	0.0252464	0.304288	0.0294448
Keratan sulfate biosynthesis	0.087418	0.025912	0.302691	0.428408	0.698455
TRAF6 mediated IRF7 activation	0.0877909	0.501784	0.0104628	0.0276368	0.700183
Synthesis of bile acids and bile salts via 7alpha-hydroxycholesterol	0.0906207	0.107966	0.916767	0.907065	0.931003
Viral Messenger RNA Synthesis	0.0928861	0.861205	0.158988	0.233473	0.0766423
TRAF6-mediated induction of TAK1 complex within TLR4 complex	0.0931404	0.407041	0.171111	0.145975	0.917997
Condensation of Prometaphase Chromosomes	0.094981	0.886355	0.174282	0.2123	0.0546301
Synthesis of bile acids and bile salts via 27-hydroxycholesterol	0.0951516	0.492981	0.703871	0.548689	0.908839
Inhibition of adenylate cyclase pathway	0.0959543	0.376421	0.529206	0.75011	0.739448
Adenylate cyclase inhibitory pathway	0.0964357	0.376439	0.53074	0.749578	0.737987
SUMOylation of chromatin organization proteins	0.0968783	0.933731	0.457386	0.572495	0.024746
O-linked glycosylation of mucins	0.0985156	0.00441563	0.354194	0.389594	0.780627
Butyrate Response Factor 1 (BRF1) binds and destabilizes mRNA	0.0993328	0.431908	0.426988	0.25382	0.670835
RNA Polymerase III Transcription Initiation	0.100566	0.438889	0.0370774	0.0599854	0.0199672
HSP90 chaperone cycle for SHRs	0.104932	0.979311	0.0187858	0.183385	0.983879
Processive synthesis on the C-strand of the telomere	0.108079	0.73349	0.231294	0.2515	0.0215403
Termination of translesion DNA synthesis	0.113415	0.510433	0.639491	0.557697	0.0293138
Cellular hexose transport	0.114178	0.065856	0.943444	0.81684	0.478039
Synthesis of bile acids and bile salts	0.116547	0.0968418	0.948765	0.93774	0.936604
Glycolysis	0.118663	0.871676	0.136356	0.162875	0.78949
Folding of actin by CCT/TriC	0.1246	0.670114	0.481308	0.480448	0.597176
Early Phase of HIV Life Cycle	0.124706	0.536388	0.805502	0.736621	0.122325
Amino acid transport across the plasma membrane	0.124858	0.0048186	0.453847	0.47961	0.776357
Global Genome Nucleotide Excision Repair (GG-NER)	0.131458	0.956714	0.625533	0.625386	0.0183699
RNA Polymerase III Transcription Initiation From Type 3 Promoter	0.133145	0.567575	0.115718	0.0983839	0.015606
Recycling of bile acids and salts	0.134537	0.145846	0.722064	0.712513	0.796599
Metabolism of water-soluble vitamins and cofactors	0.135152	0.198606	0.946398	0.90262	0.966957
Translesion Synthesis by POLH	0.138423	0.885994	0.0618294	0.11671	0.0870821
Diseases of Immune System	0.139813	0.000510818	0.00827611	0.0445632	0.941444
MASTL Facilitates Mitotic Progression	0.140083	0.94182	0.0316252	0.0588648	0.209633
Activation of the TFAP2 (AP-2) family of transcription factors	0.141288	0.435758	0.00550054	0.0145113	0.372127
Diseases associated with the TLR signaling cascade	0.141352	0.000520413	0.00859975	0.0448503	0.941382
DNA Damage Bypass	0.143318	0.82767	0.123213	0.250283	0.0302521
Purine catabolism	0.143331	0.311389	0.12547	0.216103	0.0649873
Translesion synthesis by POLK	0.144054	0.911327	0.543721	0.46383	0.0870791
Mitochondrial tRNA aminoacylation	0.147552	0.151056	0.214938	0.270814	0.0783586
Interferon alpha/beta signaling	0.149258	0.000673271	0.801601	0.450606	0.104981
tRNA modification in the nucleus and cytosol	0.152428	0.0544287	0.42403	0.40298	0.0286858
Regulated proteolysis of p75NTR	0.153804	0.563293	0.197936	0.37771	0.870646
Bile acid and bile salt metabolism	0.155653	0.0886346	0.957829	0.936744	0.918324
Translesion synthesis by REV1	0.156378	0.916496	0.524255	0.441619	0.100051
Cellular response to heat stress	0.161061	0.995243	0.0376166	0.0451562	0.336335
Nuclear signaling by ERBB4	0.1618	0.349038	0.631087	0.707539	0.378054
Surfactant metabolism	0.162058	0.0174131	0.552252	0.637045	0.958175
Tristetraprolin (TTP, ZFP36) binds and destabilizes mRNA	0.163686	0.573399	0.26228	0.112604	0.211843
Acyl chain remodelling of PS	0.167136	0.775515	0.914045	0.747927	0.0782843
Translesion synthesis by POLI	0.169578	0.911617	0.565183	0.521445	0.214873
Purine ribonucleoside monophosphate biosynthesis	0.172485	0.319266	0.669011	0.61754	0.0618519
Attenuation phase	0.173274	0.836854	0.0243296	0.00589794	0.510464
Protein-protein interactions at synapses	0.180081	0.0804701	0.890259	0.892785	0.329955
DNA Damage Recognition in GG-NER	0.180531	0.826107	0.779493	0.695713	0.0492765
Acyl chain remodelling of PC	0.180541	0.90236	0.952294	0.889074	0.327731
PLC beta mediated events	0.186309	0.717136	0.938778	0.989146	0.959918
Transport of inorganic cations/anions and amino acids/oligopeptides	0.187265	0.260076	0.716633	0.89911	0.701707
Deadenylation-dependent mRNA decay	0.189285	0.688812	0.2879	0.0709975	0.0920496
TRAF3-dependent IRF activation pathway	0.189606	0.457745	0.306956	0.150444	0.161401
NRAGE signals death through JNK	0.189967	0.00722104	0.350475	0.383082	0.903699
Activation of SMO	0.192359	0.137094	0.603456	0.527043	0.861734
Orc1 removal from chromatin	0.193692	0.377725	0.118988	0.0662578	0.0473851
ISG15 antiviral mechanism	0.195109	0.487066	0.422615	0.244556	0.138576
Antiviral mechanism by IFN-stimulated genes	0.195308	0.487325	0.423018	0.247298	0.138457
TNF receptor superfamily (TNFSF) members mediating non-canonical NF-kB pathway	0.20037	0.0348491	0.142069	0.226209	0.870647
Processing of Intronless Pre-mRNAs	0.202725	0.822639	0.1883	0.422462	0.673431
Meiosis	0.204454	0.986136	0.55239	0.802247	7.08293e-08
Sialic acid metabolism	0.20621	0.05882	0.42423	0.372211	0.843593
Toll Like Receptor 4 (TLR4) Cascade	0.207083	0.173566	0.00267705	0.00330172	0.999521
G-protein mediated events	0.207536	0.718967	0.938875	0.990774	0.921013
Acetylcholine regulates insulin secretion	0.210373	0.0148616	0.73977	0.75879	0.133707
Processing of Capped Intronless Pre-mRNA	0.213495	0.656008	0.447437	0.344196	0.392901
Chk1/Chk2(Cds1) mediated inactivation of Cyclin B:Cdk1 complex	0.221703	0.921293	0.254712	0.214676	0.161814
MyD88:Mal cascade initiated on plasma membrane	0.222506	0.161167	0.0180481	0.00694195	0.999187
Toll Like Receptor TLR1:TLR2 Cascade	0.222921	0.16106	0.0184071	0.00700703	0.999188
Toll Like Receptor 2 (TLR2) Cascade	0.223772	0.163102	0.0187149	0.00690444	0.999154
Toll Like Receptor TLR6:TLR2 Cascade	0.224258	0.16301	0.0183776	0.0069324	0.999168
Opioid Signalling	0.22463	0.6099	0.855379	0.940002	0.896942
Platelet sensitization by LDL	0.227142	0.0664052	0.187833	0.217676	0.989687
Establishment of Sister Chromatid Cohesion	0.227516	0.85949	0.402793	0.762884	0.027787
Keratan sulfate/keratin metabolism	0.23068	0.0561514	0.577756	0.623573	0.756286
STING mediated induction of host immune responses	0.233854	0.0167032	0.739115	0.508434	0.046181
Translesion synthesis by Y family DNA polymerases bypasses lesions on DNA template	0.234379	0.689862	0.345247	0.341961	0.0611599
Activated NOTCH1 Transmits Signal to the Nucleus	0.236557	0.481131	0.756431	0.779469	0.988483
Termination of O-glycan biosynthesis	0.236773	0.00243976	0.525451	0.766402	0.654907
Deadenylation of mRNA	0.238813	0.926742	0.236289	0.15877	0.33443
tRNA Aminoacylation	0.241269	0.142937	0.507297	0.424721	0.0229383
Reproduction	0.241509	0.96548	0.524883	0.784174	7.22065e-08
BBSome-mediated cargo-targeting to cilium	0.243563	0.891864	0.57439	0.632723	0.96122
SLC-mediated transmembrane transport	0.243972	0.0409026	0.98734	0.989964	0.948231
Dopamine Neurotransmitter Release Cycle	0.244258	0.803573	0.714515	0.647196	0.876745
Erythrocytes take up carbon dioxide and release oxygen	0.245704	0.202859	0.793754	0.831623	0.131758
Interconversion of nucleotide di- and triphosphates	0.251577	0.115661	0.846805	0.586588	0.571826
Cyclin D associated events in G1	0.252042	0.815783	0.253752	0.381765	0.962299
G1 Phase	0.253005	0.817259	0.25321	0.383932	0.962052
The canonical retinoid cycle in rods (twilight vision)	0.253499	0.0188544	0.269766	0.166733	0.866641
ADP signalling through P2Y purinoceptor 1	0.25417	0.00832186	0.469823	0.503655	0.810887
Assembly of the pre-replicative complex	0.254397	0.582547	0.0649067	0.0412449	0.0233329
O-linked glycosylation	0.260018	0.0114319	0.793106	0.744982	0.926344
Processing and activation of SUMO	0.264624	0.92885	0.230129	0.316688	0.754361
Signal amplification	0.265462	0.112754	0.410508	0.590281	0.866296
Meiotic recombination	0.266636	0.973355	0.731918	0.882161	1.22228e-07
Switching of origins to a post-replicative state	0.268025	0.547995	0.115803	0.117128	0.027291
Cargo trafficking to the periciliary membrane	0.268062	0.974107	0.385891	0.562399	0.988718
Gluconeogenesis	0.269493	0.116079	0.988039	0.940189	0.766934
NF-kB activation through FADD/RIP-1 pathway mediated by caspase-8 and -10	0.272999	0.203806	0.173866	0.100147	0.933276
ERK/MAPK targets	0.276188	0.462152	0.00921265	0.0512938	0.980153
cell division	0.277502	0.417971	0.654352	0.244711	0.0236262
Peroxisomal lipid metabolism	0.279131	0.344842	0.855308	0.797862	0.171367
Dissolution of Fibrin Clot	0.279424	0.0107756	0.38261	0.706367	0.835295
Interleukin-37 signaling	0.282508	0.0314309	0.488257	0.43168	0.44522
Cellular responses to stress	0.283161	0.999967	0.162214	0.196933	0.00758412
Protein methylation	0.284041	0.643408	0.814312	0.767022	0.418009
Disassembly of the destruction complex and recruitment of AXIN to the membrane	0.285412	0.903293	0.208752	0.251414	0.968431
Neurexins and neuroligins	0.286335	0.141709	0.890204	0.921268	0.209384
U12 Dependent Splicing	0.288303	0.907947	0.35243	0.357301	0.0130269
Dual Incision in GG-NER	0.288664	0.502931	0.791504	0.550959	0.023397
Nuclear Receptor transcription pathway	0.291001	0.0313421	0.0640743	0.116855	0.879718
Formation of tubulin folding intermediates by CCT/TriC	0.292713	0.832539	0.436417	0.391226	0.835983
Oncogene Induced Senescence	0.294922	0.68479	0.551633	0.422413	0.607888
Synthesis of bile acids and bile salts via 24-hydroxycholesterol	0.298607	0.0198985	0.98266	0.971405	0.917364
Inflammasomes	0.300124	0.052313	0.113557	0.0894987	0.511214
Acyl chain remodelling of PE	0.302385	0.882393	0.899484	0.826988	0.155826
TFAP2 (AP-2) family regulates transcription of growth factors and their receptors	0.302761	0.342515	0.690469	0.93635	0.060133
TP53 Regulates Transcription of Cell Death Genes	0.303138	0.387467	0.0727117	0.0897859	0.477053
Nuclear Events (kinase and transcription factor activation)	0.30514	0.463139	0.00135538	0.0313728	0.982266
Phase II - Conjugation of compounds	0.306265	0.956523	0.99374	0.987628	0.197571
Receptor-type tyrosine-protein phosphatases	0.309511	0.0423555	0.45781	0.473928	0.362272
IRF3-mediated induction of type I IFN	0.311709	0.0149937	0.72343	0.486474	0.0332842
Transcriptional Regulation by TP53	0.313314	0.999967	0.0619366	0.0538662	0.243598
Cellular Senescence	0.316984	0.994953	0.429899	0.589273	1.40528e-06
Mitotic Prophase	0.321429	0.989921	0.149685	0.198295	6.56903e-09
DNA Damage/Telomere Stress Induced Senescence	0.321573	0.961646	0.570269	0.612222	1.14504e-05
HSF1-dependent transactivation	0.32585	0.877928	0.17269	0.0438014	0.731316
Nucleotide salvage	0.327647	0.00974489	0.962264	0.992578	0.552288
MAPK targets/ Nuclear events mediated by MAP kinases	0.328122	0.523391	0.00466709	0.0433968	0.980025
ERBB2 Regulates Cell Motility	0.328148	0.322641	0.741135	0.607645	0.261059
Glycogen synthesis	0.330732	0.595318	0.838228	0.670576	0.324421
Synthesis of PIPs at the early endosome membrane	0.330835	0.876193	0.145981	0.145865	0.371384
G alpha (12/13) signalling events	0.331333	0.00456004	0.278144	0.292994	0.918847
Signaling by NOTCH4	0.332209	0.557862	0.709597	0.79529	0.942675
Response to elevated platelet cytosolic Ca2+	0.336975	0.755368	0.0999742	0.106952	0.474613
O2/CO2 exchange in erythrocytes	0.342082	0.179277	0.853831	0.775142	0.132558
Phospholipase C-mediated cascade: FGFR1	0.343708	0.000523411	0.383363	0.237568	0.648336
SLBP Dependent Processing of Replication-Dependent Histone Pre-mRNAs	0.34652	0.186971	0.5318	0.590083	0.198233
Metabolism of cofactors	0.347178	0.60316	0.798211	0.40904	0.0338123
MyD88 dependent cascade initiated on endosome	0.3537	0.728294	0.0068522	0.00674497	0.99932
Toll Like Receptor 7/8 (TLR7/8) Cascade	0.354053	0.72502	0.00689327	0.00662194	0.999354
RORA activates gene expression	0.354385	0.37253	0.378412	0.219802	0.897692
Caspase activation via extrinsic apoptotic signalling pathway	0.354526	0.0711672	0.0225473	0.0662114	0.904493
Carbohydrate metabolism	0.356112	0.505914	0.996894	0.997219	0.923553
Rho GTPase cycle	0.357096	0.00177002	0.511014	0.631893	0.948565
Cell death signalling via NRAGE, NRIF and NADE	0.359012	0.0823734	0.468828	0.400819	0.983757
Toll Like Receptor 9 (TLR9) Cascade	0.359856	0.757833	0.00442652	0.00770787	0.999416
RNA polymerase II transcribes snRNA genes	0.360033	0.998497	0.0841485	0.141548	0.947776
Assembly of collagen fibrils and other multimeric structures	0.360933	0.00174611	0.999453	0.999031	0.806035
Glycosaminoglycan metabolism	0.362884	0.141749	0.885603	0.924829	0.937602
TP53 regulates transcription of additional cell cycle genes whose exact role in the p53 pathway remain uncertain	0.364346	0.959832	0.0566132	0.27612	0.120684
Detoxification of Reactive Oxygen Species	0.364533	0.0532053	0.998331	0.995408	0.939101
Ca-dependent events	0.367394	0.539851	0.942799	0.985612	0.889938
Synthesis of IP2, IP, and Ins in the cytosol	0.367934	0.898087	0.332298	0.364653	0.27221
G-protein activation	0.373638	0.335612	0.519238	0.780656	0.557026
Nucleotide-binding domain, leucine rich repeat containing receptor (NLR) signaling pathways	0.374029	0.0962142	0.080973	0.132991	0.75886
Nitric oxide stimulates guanylate cyclase	0.375279	0.240725	0.867683	0.896378	0.938162
JNK (c-Jun kinases) phosphorylation and activation mediated by activated human TAK1	0.379285	0.676731	0.0748603	0.219584	0.889648
SHC1 events in ERBB4 signaling	0.380061	0.605054	0.541924	0.727692	0.213631
Metabolism of vitamins and cofactors	0.382274	0.481355	0.988275	0.995269	0.875414
Transcriptional activation of mitochondrial biogenesis	0.382758	0.512882	0.613469	0.773146	0.822485
VxPx cargo-targeting to cilium	0.383065	0.932911	0.422378	0.740821	0.916505
Other semaphorin interactions	0.38361	0.0171529	0.979232	0.967362	0.918862
Porphyrin metabolism	0.387548	0.463786	0.256863	0.119153	0.87764
Apoptotic cleavage of cell adhesion proteins	0.388521	0.883809	0.00818697	0.0943309	0.872454
TRAF6 mediated IRF7 activation in TLR7/8 or 9 signaling	0.390514	0.704784	0.0779654	0.239931	0.916637
Negative regulation of TCF-dependent signaling by WNT ligand antagonists	0.392287	0.390203	0.937726	0.918849	0.713633
Apoptotic cleavage of cellular proteins	0.396256	0.185112	0.0934763	0.451951	0.978589
CRMPs in Sema3A signaling	0.401199	0.518483	0.781018	0.846459	0.94482
Transcriptional regulation by small RNAs	0.402267	0.996013	0.559114	0.72929	1.08416e-07
Depolymerisation of the Nuclear Lamina	0.405902	0.826231	0.0807044	0.0822978	0.387813
Intraflagellar transport	0.406508	0.602294	0.655322	0.616335	0.955503
Repression of WNT target genes	0.412192	0.336618	0.783653	0.706829	0.474193
Vitamin B5 (pantothenate) metabolism	0.41237	0.862535	0.160569	0.207294	0.750265
HS-GAG biosynthesis	0.41379	0.711117	0.745402	0.860577	0.58683
TRAF6 mediated induction of NFkB and MAP kinases upon TLR7/8 or 9 activation	0.414706	0.6572	0.0133046	0.0095422	0.999242
TICAM1-dependent activation of IRF3/IRF7	0.416047	0.569481	0.447174	0.537808	0.920977
G alpha (z) signalling events	0.416832	0.0228407	0.531131	0.86254	0.960528
PKA activation in glucagon signalling	0.418901	0.518783	0.816916	0.923433	0.866709
Toll Like Receptor 3 (TLR3) Cascade	0.420447	0.59773	0.00304693	0.00566077	0.999597
Cyclin A:Cdk2-associated events at S phase entry	0.421956	0.778154	0.283833	0.311441	0.118592
Regulation of TP53 Activity through Association with Co-factors	0.425838	0.311617	0.753069	0.747676	0.680658
p75 NTR receptor-mediated signalling	0.426418	0.113299	0.611024	0.524028	0.988084
Methylation	0.426536	0.939288	0.566681	0.36136	0.217769
Regulation of innate immune responses to cytosolic DNA	0.42691	0.0678335	0.435528	0.325283	0.460388
Signaling by NOTCH1	0.427399	0.401648	0.945309	0.950441	0.99896
Signaling by Rho GTPases	0.428421	0.843886	0.268111	0.822565	0.000864278
Nicotinamide salvaging	0.431442	0.182145	0.517171	0.65314	0.878671
Cyclin E associated events during G1/S transition	0.43155	0.744619	0.313525	0.274654	0.111994
RA biosynthesis pathway	0.433215	0.0644011	0.212967	0.0953477	0.861345
FCERI mediated Ca+2 mobilization	0.436133	0.233344	0.696161	0.864479	0.39492
Carboxyterminal post-translational modifications of tubulin	0.437037	0.935028	0.74004	0.468224	0.932937
Regulation of gene expression by Hypoxia-inducible Factor	0.440125	0.863476	0.328779	0.369855	0.208087
TNFs bind their physiological receptors	0.441201	4.48738e-05	0.618303	0.460747	0.885515
NOD1/2 Signaling Pathway	0.442613	0.472003	0.267111	0.470679	0.459396
Mitochondrial biogenesis	0.442921	0.382591	0.808103	0.938325	0.294692
Cytosolic iron-sulfur cluster assembly	0.44307	0.667004	0.531418	0.601026	0.0288972
TRIF(TICAM1)-mediated TLR4 signaling	0.444805	0.593168	0.00316236	0.00519974	0.999667
MyD88-independent TLR4 cascade	0.445123	0.597269	0.00315278	0.00530944	0.999666
Diseases of metabolism	0.446941	0.604743	0.982857	0.903737	0.748776
Cytosolic tRNA aminoacylation	0.4499	0.429344	0.917173	0.790916	0.0763601
RUNX1 interacts with co-factors whose precise effect on RUNX1 targets is not known	0.449976	0.898847	0.387698	0.788383	0.915655
Regulation of insulin secretion	0.453418	0.405801	0.917574	0.993148	0.952577
NOTCH3 Activation and Transmission of Signal to the Nucleus	0.45442	0.749242	0.852676	0.807664	0.915919
Activation of Nicotinic Acetylcholine Receptors	0.454889	0.130462	0.825076	0.793761	0.740737
Postsynaptic nicotinic acetylcholine receptors	0.456763	0.129975	0.825229	0.79073	0.740304
Acetylcholine binding and downstream events	0.457047	0.130127	0.827186	0.79163	0.740094
ERKs are inactivated	0.4571	0.815688	0.029781	0.0273808	0.988941
PPARA activates gene expression	0.458051	0.856527	0.117054	0.0376321	0.328704
Presynaptic depolarization and calcium channel opening	0.459485	0.0212109	0.818322	0.890063	0.89471
SMAD2/SMAD3:SMAD4 heterotrimer regulates transcription	0.459972	0.124234	0.312744	0.145074	0.998453
Interferon Signaling	0.464366	0.00281066	0.49798	0.365232	0.24483
NOTCH2 Activation and Transmission of Signal to the Nucleus	0.46598	0.752055	0.765909	0.808962	0.995023
Heparan sulfate/heparin (HS-GAG) metabolism	0.466136	0.306626	0.818373	0.725694	0.687329
Ca2+ pathway	0.469425	0.736398	0.66537	0.928446	0.98793
BMAL1:CLOCK,NPAS2 activates circadian gene expression	0.475461	0.405384	0.535419	0.244127	0.318457
FGFR1 ligand binding and activation	0.475671	0.000468479	0.216543	0.11496	0.643082
RHO GTPases Activate NADPH Oxidases	0.477439	0.0050095	0.43357	0.530541	0.651575
RNA Polymerase I Transcription Termination	0.481316	0.332332	0.0779654	0.0868475	0.148142
SLBP independent Processing of Histone Pre-mRNAs	0.484025	0.0402747	0.714298	0.700893	0.229081
Transport of vitamins, nucleosides, and related molecules	0.487769	0.218913	0.891617	0.891091	0.908167
Regulation of PTEN gene transcription	0.490306	0.936391	0.418263	0.685935	0.257079
Josephin domain DUBs	0.492711	0.747805	0.749744	0.575812	0.929265
Beta-catenin phosphorylation cascade	0.492748	0.949251	0.203205	0.370429	0.957878
Syndecan interactions	0.493334	0.219292	0.577339	0.508401	0.854175
Synthesis of Prostaglandins (PG) and Thromboxanes (TX)	0.493585	0.464589	0.934736	0.840021	0.685363
Heme biosynthesis	0.494428	0.512393	0.661144	0.500175	0.864265
Regulation of lipid metabolism by Peroxisome proliferator-activated receptor alpha (PPARalpha)	0.494483	0.87494	0.122347	0.0444032	0.345492
A tetrasaccharide linker sequence is required for GAG synthesis	0.496102	0.0360007	0.56181	0.516928	0.770048
Unfolded Protein Response (UPR)	0.497885	0.955983	0.538603	0.496674	0.605921
Biological oxidations	0.499761	0.605453	0.99912	0.998888	0.974995
Apoptotic execution phase	0.501491	0.462726	0.302844	0.726919	0.896648
ERBB2 Activates PTK6 Signaling	0.504711	0.0776297	0.268485	0.0735641	0.221759
Signaling by NOTCH	0.505046	0.266673	0.921946	0.984491	0.996114
Nonhomologous End-Joining (NHEJ)	0.510657	0.943819	0.413218	0.706784	4.88957e-05
RNA Polymerase I Promoter Escape	0.51156	0.305764	0.0881556	0.0953458	0.250885
Prostacyclin signalling through prostacyclin receptor	0.513499	0.00812781	0.616796	0.739126	0.868438
SUMOylation of transcription factors	0.515624	0.917867	0.708347	0.842254	0.666007
TNFR1-induced proapoptotic signaling	0.515641	0.0833549	0.340842	0.173428	0.812803
Phospholipase C-mediated cascade; FGFR3	0.515981	0.608396	0.42921	0.401651	0.571753
The NLRP3 inflammasome	0.517073	0.206036	0.133595	0.0624751	0.434989
Activation of BH3-only proteins	0.517377	0.834472	0.679084	0.842846	0.902549
Class B/2 (Secretin family receptors)	0.51824	0.775526	0.919664	0.891862	0.596139
G alpha (q) signalling events	0.521094	2.8218e-06	0.688102	0.834857	0.608249
Triglyceride catabolism	0.521778	0.704488	0.478991	0.451292	0.241186
Cooperation of Prefoldin and TriC/CCT in actin and tubulin folding	0.52379	0.836361	0.540487	0.543142	0.844178
Toll Like Receptor 10 (TLR10) Cascade	0.524231	0.862782	0.0646774	0.0336696	0.999534
Prefoldin mediated transfer of substrate to CCT/TriC	0.524277	0.934508	0.405003	0.539423	0.732445
Inactivation of APC/C via direct inhibition of the APC/C complex	0.524935	0.299774	0.218765	0.204442	0.116247
MyD88 cascade initiated on plasma membrane	0.525071	0.862316	0.0644132	0.0336396	0.999519
Inhibition of the proteolytic activity of APC/C required for the onset of anaphase by mitotic spindle checkpoint components	0.525446	0.303116	0.218209	0.2054	0.116827
Toll Like Receptor 5 (TLR5) Cascade	0.525692	0.861852	0.0634302	0.0340818	0.999556
Glutathione synthesis and recycling	0.529088	0.825561	0.270819	0.302362	0.156418
Signaling by Retinoic Acid	0.529475	0.0282186	0.179927	0.210847	0.68705
mTORC1-mediated signalling	0.531346	0.558495	0.425609	0.558051	0.430776
Signaling by NOTCH3	0.531783	0.538458	0.852656	0.900746	0.985443
Nucleobase catabolism	0.533503	0.356197	0.463367	0.571426	0.237922
Glutamate Neurotransmitter Release Cycle	0.534237	0.87756	0.619894	0.745986	0.841657
PKMTs methylate histone lysines	0.536455	0.967571	0.730427	0.665161	1.25863e-06
Interaction between L1 and Ankyrins	0.537211	0.858073	0.904841	0.830367	0.790003
CaM pathway	0.540492	0.495454	0.978519	0.994534	0.913283
FGFR2 ligand binding and activation	0.540798	0.340067	0.75394	0.593833	0.367955
Calmodulin induced events	0.541487	0.499088	0.978523	0.994784	0.912771
Thrombin signalling through proteinase activated receptors (PARs)	0.541877	0.00838959	0.851662	0.812739	0.933266
CDT1 association with the CDC6:ORC:origin complex	0.546635	0.950667	0.15844	0.0905782	0.196461
Constitutive Signaling by Aberrant PI3K in Cancer	0.546982	0.0162726	0.347206	0.299739	0.430954
Nucleotide Excision Repair	0.547735	0.995298	0.760892	0.780374	0.0417077
SHC-mediated cascade:FGFR1	0.550793	0.100205	0.443603	0.572738	0.733506
Thromboxane signalling through TP receptor	0.551067	0.00933896	0.550857	0.61774	0.855395
Intrinsic Pathway for Apoptosis	0.552427	0.929411	0.408661	0.729283	0.972619
CD209 (DC-SIGN) signaling	0.553579	0.939389	0.342097	0.637846	0.821351
Lysosome Vesicle Biogenesis	0.556654	0.556528	0.987575	0.941829	0.795381
TRAF6 mediated NF-kB activation	0.557483	0.7449	0.312924	0.185845	0.576673
Inactivation, recovery and regulation of the phototransduction cascade	0.558855	0.933776	0.833906	0.690356	0.978113
Toll-Like Receptors Cascades	0.559048	0.337832	0.0198541	0.0219288	0.999796
p38MAPK events	0.560091	0.292856	0.922336	0.923833	0.600918
Cellular responses to external stimuli	0.560851	0.999999	0.238076	0.21694	0.0146173
FGFRL1 modulation of FGFR1 signaling	0.561067	0.61474	0.653442	0.604829	0.549744
Regulation of beta-cell development	0.562127	0.347661	0.769124	0.780905	0.59119
Golgi Cisternae Pericentriolar Stack Reorganization	0.562718	0.78424	0.248723	0.22794	0.277099
Integration of energy metabolism	0.563027	0.644663	0.983508	0.991814	0.970426
Deactivation of the beta-catenin transactivating complex	0.568634	0.898917	0.548407	0.723616	0.98347
GABA B receptor activation	0.570736	0.146789	0.811343	0.828191	0.708572
Activation of GABAB receptors	0.571421	0.150566	0.812654	0.828177	0.708262
Deposition of new CENPA-containing nucleosomes at the centromere	0.571544	0.977816	0.412041	0.684667	4.07295e-07
Nucleosome assembly	0.571995	0.978235	0.414477	0.682973	4.37713e-07
Potassium Channels	0.572036	0.264594	0.979783	0.942188	0.713123
Regulation of gene expression in beta cells	0.572427	0.234966	0.743463	0.793835	0.740034
Voltage gated Potassium channels	0.572459	0.198474	0.946841	0.853507	0.695677
Formation of Senescence-Associated Heterochromatin Foci (SAHF)	0.572702	0.767699	0.80064	0.669631	0.447584
Platelet homeostasis	0.572928	0.0370409	0.95172	0.835924	0.989756
G beta:gamma signalling through PLC beta	0.573108	0.0139938	0.607567	0.793858	0.855719
Sema3A PAK dependent Axon repulsion	0.574706	0.598176	0.673613	0.738542	0.956283
Synthesis of PC	0.579443	0.846078	0.76778	0.594082	0.897611
Interleukin-35 Signalling	0.580003	0.581581	0.925843	0.934734	0.834936
Inositol phosphate metabolism	0.580355	0.799015	0.765356	0.697903	0.817925
Vasopressin regulates renal water homeostasis via Aquaporins	0.58129	0.177287	0.698891	0.861006	0.733091
TP53 Regulates Transcription of Genes Involved in Cytochrome C Release	0.585496	0.563773	0.230842	0.267343	0.908966
PI5P, PP2A and IER3 Regulate PI3K/AKT Signaling	0.58628	0.208632	0.334425	0.382718	0.735624
Regulation of mitotic cell cycle	0.589683	0.705964	0.122299	0.127284	0.214088
Neurotransmitter release cycle	0.589728	0.904163	0.876576	0.878659	0.706618
APC/C-mediated degradation of cell cycle proteins	0.591427	0.706681	0.122707	0.126767	0.213982
DEx/H-box helicases activate type I IFN and inflammatory cytokines production	0.594893	0.895045	0.246464	0.142713	0.247195
Activated point mutants of FGFR2	0.595112	0.339182	0.805796	0.64603	0.672596
IKK complex recruitment mediated by RIP1	0.597215	0.424745	0.0565439	0.114438	0.969029
Inhibition of voltage gated Ca2+ channels via Gbeta/gamma subunits	0.60255	0.243981	0.882586	0.944035	0.52045
Signaling by Leptin	0.60348	0.873953	0.7341	0.721091	0.822817
Insulin processing	0.603634	0.837586	0.76637	0.822068	0.867796
DARPP-32 events	0.604041	0.890064	0.786579	0.937529	0.771313
Activation of G protein gated Potassium channels	0.604106	0.242621	0.883234	0.943694	0.523636
Adrenaline,noradrenaline inhibits insulin secretion	0.60486	0.26027	0.607694	0.877451	0.923895
G protein gated Potassium channels	0.605416	0.243889	0.883174	0.943209	0.522285
Signaling by Activin	0.605689	0.841652	0.817093	0.657506	0.860831
Metal ion SLC transporters	0.606529	0.521441	0.746255	0.661859	0.285728
Antigen activates B Cell Receptor (BCR) leading to generation of second messengers	0.606934	0.0753112	0.430687	0.410815	0.962898
Aquaporin-mediated transport	0.607665	0.18114	0.706657	0.872053	0.736255
Programmed Cell Death	0.610431	0.711443	0.143809	0.458296	0.998885
ZBP1(DAI) mediated induction of type I IFNs	0.611403	0.512723	0.276006	0.275285	0.521096
COPI-independent Golgi-to-ER retrograde traffic	0.613919	0.964819	0.287892	0.503669	0.997474
Cell surface interactions at the vascular wall	0.614576	0.00108519	0.413098	0.869319	0.9976
Factors involved in megakaryocyte development and platelet production	0.615534	0.553721	0.610196	0.800544	0.0261372
TP53 regulates transcription of several additional cell death genes whose specific roles in p53-dependent apoptosis remain uncertain	0.615567	0.881837	0.702299	0.521183	0.702173
Generation of second messenger molecules	0.616282	0.268313	0.791574	0.771092	0.145591
FGFR3 ligand binding and activation	0.616399	0.608886	0.707236	0.456616	0.471642
Kinesins	0.616822	0.901428	0.363435	0.625038	0.304322
Transcriptional regulation of white adipocyte differentiation	0.61737	0.779482	0.482741	0.195885	0.556661
FGFR3c ligand binding and activation	0.618153	0.608334	0.709481	0.453677	0.473431
Regulation of TP53 Activity through Acetylation	0.621644	0.919021	0.792363	0.765809	0.704208
Defects in vitamin and cofactor metabolism	0.622226	0.676904	0.982426	0.991435	0.827384
Activation of the AP-1 family of transcription factors	0.622525	0.692565	0.361972	0.559192	0.896404
Chondroitin sulfate biosynthesis	0.623534	0.0546358	0.633202	0.725844	0.677913
Gene Silencing by RNA	0.624267	0.994606	0.657578	0.892239	8.02595e-06
FGFR2c ligand binding and activation	0.626314	0.351421	0.822579	0.617113	0.598816
Calcineurin activates NFAT	0.626833	0.929922	0.897245	0.897619	0.872487
Peptide ligand-binding receptors	0.627365	7.12378e-11	0.932564	0.94431	0.425348
Glycerophospholipid biosynthesis	0.62882	0.940143	0.997177	0.995933	0.56941
AKT phosphorylates targets in the cytosol	0.629371	0.938307	0.693737	0.868777	0.238644
Presynaptic function of Kainate receptors	0.629564	0.019791	0.67745	0.848441	0.855037
DAP12 interactions	0.629569	0.0189999	0.360908	0.667323	0.063666
Signal regulatory protein family interactions	0.631972	0.0210446	0.903382	0.850252	0.0135787
Gap-filling DNA repair synthesis and ligation in TC-NER	0.632223	0.95821	0.8662	0.815845	0.0805065
Synthesis, secretion, and deacylation of Ghrelin	0.633311	0.141982	0.74829	0.548083	0.913099
Apoptosis	0.637207	0.742218	0.162391	0.479445	0.999191
Chaperonin-mediated protein folding	0.641387	0.879241	0.450856	0.537797	0.988112
mTOR signalling	0.643556	0.855412	0.533798	0.648377	0.382823
FCGR activation	0.64442	0.0541711	0.651348	0.707884	0.747358
APC-Cdc20 mediated degradation of Nek2A	0.644852	0.519814	0.438668	0.370972	0.143959
The phototransduction cascade	0.645989	0.92985	0.84044	0.691271	0.979695
DAP12 signaling	0.647313	0.136809	0.405977	0.681383	0.48998
GABA synthesis, release, reuptake and degradation	0.648291	0.814559	0.835177	0.741481	0.642146
Synthesis of PIPs at the late endosome membrane	0.648963	0.858454	0.226095	0.250427	0.742581
G alpha (i) signalling events	0.649129	1.96326e-08	0.932521	0.992065	0.661365
FCERI mediated MAPK activation	0.649833	0.227801	0.257298	0.487861	0.243082
FGFR2 alternative splicing	0.650366	0.977269	0.533515	0.76801	0.142888
Phase I - Functionalization of compounds	0.650728	0.0628021	0.979898	0.985041	0.976299
Signaling by BMP	0.652866	0.896312	0.258909	0.511943	0.384296
Signaling by NOTCH2	0.653547	0.837948	0.807648	0.871626	0.984099
RMTs methylate histone arginines	0.654942	0.92366	0.889043	0.927935	1.34974e-06
Phospholipase C-mediated cascade; FGFR2	0.655313	0.34983	0.856669	0.586074	0.676097
p75NTR recruits signalling complexes	0.657839	0.712948	0.291612	0.431107	0.983962
Formation of the beta-catenin:TCF transactivating complex	0.657873	0.894449	0.0563842	0.470728	8.86034e-08
RHO GTPase Effectors	0.658325	0.999222	0.360613	0.717665	8.37296e-06
Signalling to RAS	0.659298	0.371227	0.905567	0.893052	0.955089
MAP kinase activation	0.660939	0.63107	0.0169045	0.0148724	0.999622
Activation of BAD and translocation to mitochondria	0.661597	0.396354	0.751288	0.859824	0.359347
EPH-ephrin mediated repulsion of cells	0.661699	0.751132	0.884526	0.95733	0.829151
Activation of APC/C and APC/C:Cdc20 mediated degradation of mitotic proteins	0.663523	0.668818	0.205521	0.290971	0.217156
HIV Life Cycle	0.663979	0.998676	0.226994	0.354659	0.586014
RNA Polymerase I Transcription Initiation	0.666188	0.316792	0.669281	0.441495	0.283865
Signaling by FGFR2 IIIa TM	0.667242	0.929734	0.723719	0.623503	0.749384
Inwardly rectifying K+ channels	0.667982	0.31642	0.94203	0.960957	0.395542
Caspase-mediated cleavage of cytoskeletal proteins	0.669751	0.299135	0.427353	0.544544	0.953788
Interleukin-2 signaling	0.67088	0.253096	0.677661	0.725295	0.363799
Digestion and absorption	0.672369	0.0648116	0.96918	0.980531	0.458422
Regulation of IFNA signaling	0.673172	0.203343	0.617811	0.519338	0.629981
Synthesis of PIPs at the Golgi membrane	0.67392	0.903994	0.658976	0.691704	0.871973
CREB phosphorylation through the activation of Ras	0.674589	0.733281	0.860059	0.909627	0.271936
APC/C:Cdc20 mediated degradation of mitotic proteins	0.675832	0.781692	0.215891	0.306935	0.244178
Gastrin-CREB signalling pathway via PKC and MAPK	0.677228	0.836767	0.219847	0.636542	0.292831
TAK1 activates NFkB by phosphorylation and activation of IKKs complex	0.678259	0.803429	0.36946	0.429573	0.717928
YAP1- and WWTR1 (TAZ)-stimulated gene expression	0.678396	0.149371	0.921191	0.783427	0.00790706
ADP signalling through P2Y purinoceptor 12	0.679687	0.271904	0.564537	0.824386	0.86232
FGFR2 mutant receptor activation	0.68	0.931086	0.753352	0.663628	0.81002
CLEC7A (Dectin-1) induces NFAT activation	0.680391	0.928662	0.907808	0.916449	0.726283
Neurodegenerative Diseases	0.683337	0.757766	0.827128	0.90227	0.762247
Regulation of APC/C activators between G1/S and early anaphase	0.683698	0.703255	0.249959	0.178522	0.308789
SHC-mediated cascade:FGFR2	0.68381	0.745288	0.676813	0.8183	0.751134
Formation of Incision Complex in GG-NER	0.684424	0.994494	0.857234	0.8886	0.59375
Translation	0.684742	0.321786	0.541412	0.219752	0.000139331
Deregulated CDK5 triggers multiple neurodegenerative pathways in Alzheimer's disease models	0.685532	0.759624	0.827103	0.899858	0.762919
Interleukin-17 signaling	0.687517	0.481548	0.0179408	0.00663192	0.998054
SHC-mediated cascade:FGFR4	0.68906	0.774423	0.710812	0.850856	0.728119
FGFR4 ligand binding and activation	0.689333	0.436601	0.874537	0.715911	0.62456
Signaling by NOTCH1 PEST Domain Mutants in Cancer	0.689731	0.521429	0.958769	0.952896	0.994968
Constitutive Signaling by NOTCH1 HD+PEST Domain Mutants	0.690377	0.520446	0.95811	0.952659	0.995038
G1/S DNA Damage Checkpoints	0.690602	0.982912	0.378468	0.217126	0.219202
Signaling by NOTCH1 HD+PEST Domain Mutants in Cancer	0.691079	0.51985	0.958176	0.953451	0.994904
Norepinephrine Neurotransmitter Release Cycle	0.691167	0.786757	0.966147	0.991874	0.734751
Fertilization	0.692055	0.104081	0.901489	0.904933	0.488402
Serotonin Neurotransmitter Release Cycle	0.692248	0.786167	0.767159	0.856762	0.727898
Signaling by NOTCH1 in Cancer	0.692496	0.521318	0.958004	0.952908	0.994812
Constitutive Signaling by NOTCH1 PEST Domain Mutants	0.692587	0.520137	0.95834	0.953828	0.995048
Netrin-1 signaling	0.693197	0.894486	0.579355	0.723788	0.934268
Glucagon-type ligand receptors	0.693955	0.267833	0.902407	0.92932	0.547301
Regulation of TP53 Activity through Methylation	0.694499	0.388921	0.716525	0.494933	0.606261
SEMA3A-Plexin repulsion signaling by inhibiting Integrin adhesion	0.69482	0.66629	0.664472	0.583831	0.959322
NRIF signals cell death from the nucleus	0.698584	0.888038	0.821947	0.632544	0.98114
Transcription-Coupled Nucleotide Excision Repair (TC-NER)	0.69947	0.979268	0.737125	0.758082	0.0908064
Glucagon signaling in metabolic regulation	0.700066	0.194171	0.731722	0.935803	0.969278
ABC transporters in lipid homeostasis	0.700521	0.866694	0.990027	0.996397	0.888012
Chromatin organization	0.70091	0.998928	0.554626	0.715669	1.25346e-08
Chromatin modifying enzymes	0.70142	0.998867	0.55719	0.714912	1.2482e-08
GABA receptor activation	0.701611	0.178791	0.875747	0.93831	0.416599
Signaling by ERBB4	0.702566	0.851554	0.545164	0.533938	0.722178
Interleukin-7 signaling	0.704062	0.891024	0.788258	0.395185	0.000504953
Phase 2 - plateau phase	0.706203	0.00138425	0.606018	0.493842	0.915982
Glutathione conjugation	0.707559	0.77739	0.978125	0.986316	0.0900679
APC:Cdc20 mediated degradation of cell cycle proteins prior to satisfation of the cell cycle checkpoint	0.707725	0.751584	0.270037	0.274924	0.275766
RUNX2 regulates bone development	0.712128	0.789117	0.311291	0.63485	0.836132
Negative regulation of the PI3K/AKT network	0.712395	0.279139	0.491615	0.504509	0.716514
Visual phototransduction	0.712734	0.39427	0.968608	0.955371	0.861806
Regulation of TP53 Expression and Degradation	0.71334	0.799405	0.319847	0.043078	0.965722
SeMet incorporation into proteins	0.71397	0.546213	0.834492	0.447062	0.143611
RUNX2 regulates osteoblast differentiation	0.71477	0.637774	0.571608	0.815993	0.950233
The role of GTSE1 in G2/M progression after G2 checkpoint	0.716273	0.96498	0.30149	0.228127	0.321022
DDX58/IFIH1-mediated induction of interferon-alpha/beta	0.716865	0.65175	0.280998	0.104116	0.980364
NOTCH3 Intracellular Domain Regulates Transcription	0.717307	0.287705	0.684632	0.861712	0.933775
Hedgehog 'on' state	0.717491	0.917675	0.256024	0.315762	0.885226
AUF1 (hnRNP D0) binds and destabilizes mRNA	0.717738	0.961358	0.297938	0.235226	0.492419
Epigenetic regulation of gene expression	0.717991	0.991921	0.686099	0.607771	7.18116e-09
Interleukin-4 and 13 signaling	0.721565	0.00879269	0.892061	0.705705	0.705903
Pentose phosphate pathway (hexose monophosphate shunt)	0.721928	0.759554	0.958432	0.956853	0.0901688
Cdc20:Phospho-APC/C mediated degradation of Cyclin A	0.722003	0.722175	0.302165	0.29918	0.299452
Non-integrin membrane-ECM interactions	0.722288	0.238498	0.967026	0.967816	0.463833
activated TAK1 mediates p38 MAPK activation	0.722944	0.507817	0.148581	0.302841	0.977426
Host Interactions of HIV factors	0.72517	0.974683	0.590543	0.448458	0.530704
HDMs demethylate histones	0.72526	0.950102	0.758257	0.638522	2.38725e-06
Association of TriC/CCT with target proteins during biosynthesis	0.725384	0.792539	0.551978	0.672513	0.798841
Interferon gamma signaling	0.725528	0.000273532	0.720294	0.53669	0.216336
Gap junction degradation	0.727036	0.763118	0.702518	0.95378	0.875437
Phospholipase C-mediated cascade; FGFR4	0.727262	0.443814	0.892027	0.759699	0.631666
B-WICH complex positively regulates rRNA expression	0.728057	0.958494	0.8215	0.911289	5.19817e-08
Lysine catabolism	0.729793	0.350297	0.77691	0.678012	0.924343
Signaling by NOTCH1 HD Domain Mutants in Cancer	0.730612	0.885449	0.770262	0.78209	0.990624
Gene and protein expression by JAK-STAT signaling after Interleukin-12 stimulation	0.730767	0.174492	0.718165	0.90986	0.488927
Constitutive Signaling by NOTCH1 HD Domain Mutants	0.732507	0.8863	0.769176	0.782803	0.990745
Gap junction trafficking	0.733204	0.7663	0.725869	0.955382	0.976478
Acetylcholine Neurotransmitter Release Cycle	0.735204	0.797268	0.665957	0.89456	0.71549
Late Phase of HIV Life Cycle	0.735914	0.999477	0.219822	0.304608	0.656812
Energy dependent regulation of mTOR by LKB1-AMPK	0.73687	0.875084	0.423004	0.492394	0.342477
Dual incision in TC-NER	0.739847	0.967451	0.842898	0.770366	0.213172
RIP-mediated NFkB activation via ZBP1	0.739881	0.75475	0.448162	0.44351	0.604136
Budding and maturation of HIV virion	0.740801	0.886608	0.71688	0.601391	0.906784
DAG and IP3 signaling	0.741135	0.606444	0.994394	0.99879	0.94241
Circadian Clock	0.741695	0.778493	0.363026	0.385682	0.850245
Signal transduction by L1	0.741772	0.810299	0.783761	0.781703	0.929634
Phosphorylation of the APC/C	0.741961	0.397995	0.36517	0.322049	0.0667427
SCF(Skp2)-mediated degradation of p27/p21	0.742901	0.902106	0.425342	0.325724	0.350381
Oxidative Stress Induced Senescence	0.74298	0.966798	0.721253	0.918725	4.49458e-07
Degradation of beta-catenin by the destruction complex	0.74309	0.967166	0.480973	0.416891	0.944228
Ubiquitin Mediated Degradation of Phosphorylated Cdc25A	0.743812	0.939399	0.33113	0.212862	0.447958
p53-Independent DNA Damage Response	0.744292	0.939863	0.332104	0.21239	0.449452
p53-Independent G1/S DNA damage checkpoint	0.745027	0.939909	0.332581	0.214016	0.449196
APC/C:Cdh1 mediated degradation of Cdc20 and other APC/C:Cdh1 targeted proteins in late mitosis/early G1	0.745314	0.749732	0.2789	0.373482	0.309842
Signaling by NTRK2 (TRKB)	0.746515	0.881029	0.44543	0.60112	0.984257
Biosynthesis of DHA-derived SPMs	0.746705	0.2987	0.993501	0.993985	0.950359
p53-Dependent G1/S DNA damage checkpoint	0.74788	0.975017	0.372438	0.273758	0.334643
Positive epigenetic regulation of rRNA expression	0.748062	0.967943	0.901873	0.952306	3.30294e-08
p53-Dependent G1 DNA Damage Response	0.748623	0.975468	0.374564	0.272419	0.335682
Mitochondrial calcium ion transport	0.751396	0.860268	0.717764	0.835691	0.157401
UCH proteinases	0.751781	0.96153	0.205624	0.280722	0.0561548
Signaling by WNT in cancer	0.752337	0.952307	0.386358	0.56428	0.962121
Class A/1 (Rhodopsin-like receptors)	0.752409	1.40287e-10	0.954579	0.960623	0.460166
Signaling by Hippo	0.753503	0.826888	0.257018	0.573192	0.696116
Receptor-ligand binding initiates the second proteolytic cleavage of Notch receptor	0.753539	0.814716	0.702586	0.73323	0.986775
Regulation of FZD by ubiquitination	0.755431	0.872441	0.815397	0.755026	0.757118
SHC-mediated cascade:FGFR3	0.756098	0.817263	0.449174	0.660019	0.683019
Dectin-2 family	0.757138	0.19504	0.971905	0.936161	0.768014
Interleukin-2 family signaling	0.758752	0.0515328	0.618841	0.433778	0.686462
Synaptic adhesion-like molecules	0.759318	0.519056	0.905056	0.787914	0.0537729
Regulation of Apoptosis	0.760447	0.928898	0.281722	0.302129	0.611285
Condensation of Prophase Chromosomes	0.762192	0.9484	0.76638	0.899299	4.4721e-07
Downregulation of TGF-beta receptor signaling	0.762508	0.839645	0.422207	0.496231	0.967492
Cristae formation	0.763781	0.0351232	0.951236	0.990435	0.0510949
GRB2 events in ERBB2 signaling	0.764576	0.544638	0.740682	0.81441	0.221421
Degradation of DVL	0.765165	0.944929	0.296948	0.263565	0.756278
Interleukin receptor SHC signaling	0.765657	0.0773299	0.621846	0.44624	0.844338
CDK-mediated phosphorylation and removal of Cdc6	0.765767	0.931142	0.302515	0.311107	0.308348
Endosomal Sorting Complex Required For Transport (ESCRT)	0.76817	0.862511	0.373195	0.352529	0.970225
CLEC7A (Dectin-1) signaling	0.768513	0.85776	0.465437	0.240036	0.931645
Growth hormone receptor signaling	0.769651	0.474884	0.553019	0.504564	0.713669
TCF dependent signaling in response to WNT	0.771269	0.999553	0.191607	0.274068	0.00046508
Ephrin signaling	0.772078	0.813674	0.785066	0.759816	0.971999
Antigen processing-Cross presentation	0.772093	0.0181578	0.747356	0.633108	0.94809
S33 mutants of beta-catenin aren't phosphorylated	0.772182	0.946452	0.296708	0.519037	0.980055
S45 mutants of beta-catenin aren't phosphorylated	0.773146	0.947019	0.294851	0.517454	0.979996
Misspliced GSK3beta mutants stabilize beta-catenin	0.773476	0.946377	0.295288	0.518305	0.98032
S37 mutants of beta-catenin aren't phosphorylated	0.773586	0.945961	0.29448	0.518332	0.979797
Regulation of TP53 Degradation	0.773609	0.911014	0.403505	0.0577129	0.903207
RAB geranylgeranylation	0.775487	0.584215	0.413394	0.391816	0.924165
Protein folding	0.775513	0.919089	0.548167	0.694295	0.982483
phosphorylation site mutants of CTNNB1 are not targeted to the proteasome by the destruction complex	0.77552	0.945114	0.294583	0.51739	0.979972
T41 mutants of beta-catenin aren't phosphorylated	0.776557	0.946123	0.293879	0.51875	0.980059
HATs acetylate histones	0.776915	0.997858	0.0417735	0.177383	4.85993e-09
Uptake and actions of bacterial toxins	0.778674	0.544229	0.511197	0.764007	0.833831
Xenobiotics	0.778834	0.62257	0.242866	0.492041	0.936124
VLDLR internalisation and degradation	0.779552	0.652647	0.801784	0.65807	0.626771
NOTCH2 intracellular domain regulates transcription	0.781482	0.836751	0.813062	0.91028	0.796499
Gap junction trafficking and regulation	0.783587	0.601869	0.865312	0.95266	0.979972
RAB GEFs exchange GTP for GDP on RABs	0.784257	0.636571	0.495221	0.450023	0.99863
DNA Double Strand Break Response	0.784389	0.979164	0.705524	0.856505	1.80787e-05
Regulation of PTEN stability and activity	0.785221	0.967568	0.220356	0.336032	0.83395
Interleukin-3, 5 and GM-CSF signaling	0.785787	0.111803	0.377488	0.390709	0.903217
Tie2 Signaling	0.786265	0.633391	0.290109	0.555297	0.941907
Steroid hormones	0.787449	0.573409	0.694785	0.834698	0.86804
Sphingolipid de novo biosynthesis	0.787451	0.96918	0.501577	0.673135	0.974446
Dectin-1 mediated noncanonical NF-kB signaling	0.788195	0.951374	0.379864	0.206867	0.732357
Nicotinate metabolism	0.788443	0.29652	0.892148	0.893051	0.904509
Plasma lipoprotein remodeling	0.790171	0.874695	0.962706	0.984085	0.842358
Tetrahydrobiopterin (BH4) synthesis, recycling, salvage and regulation	0.791888	0.790775	0.993522	0.965005	0.291919
LGI-ADAM interactions	0.792588	0.171314	0.952584	0.825387	0.279595
NIK-->noncanonical NF-kB signaling	0.792784	0.943564	0.380042	0.231495	0.691201
Cross-presentation of soluble exogenous antigens (endosomes)	0.793791	0.924032	0.316432	0.280621	0.523978
Role of LAT2/NTAL/LAB on calcium mobilization	0.794491	0.420149	0.474839	0.392907	0.797668
SCF-beta-TrCP mediated degradation of Emi1	0.795289	0.932094	0.285632	0.173544	0.672831
Cell-cell junction organization	0.796989	0.882782	0.950003	0.896902	0.530959
FBXL7 down-regulates AURKA during mitotic entry and in early mitosis	0.797373	0.890194	0.36054	0.328509	0.523979
Asymmetric localization of PCP proteins	0.798008	0.963752	0.382934	0.165169	0.66467
Scavenging by Class A Receptors	0.798032	0.769135	0.992563	0.999403	0.120524
Abortive elongation of HIV-1 transcript in the absence of Tat	0.798219	0.977607	0.781388	0.757212	0.602358
Activation of kainate receptors upon glutamate binding	0.799232	0.123932	0.928631	0.978948	0.719891
ROS, RNS production in phagocytes	0.7994	0.0808845	0.748253	0.771159	0.900824
Pre-NOTCH Processing in Golgi	0.80064	0.0425083	0.487341	0.888841	0.927759
VEGFR2 mediated vascular permeability	0.800907	0.684666	0.865772	0.961786	0.250732
Regulation of RAS by GAPs	0.801271	0.807989	0.339738	0.332394	0.989284
Regulation of Hypoxia-inducible Factor (HIF) by oxygen	0.80177	0.991382	0.456539	0.379988	0.780682
Cellular response to hypoxia	0.801885	0.99131	0.456998	0.378919	0.782985
Laminin interactions	0.802711	0.315204	0.987122	0.998351	0.769333
Glyoxylate metabolism and glycine degradation	0.803394	0.888234	0.904779	0.824961	0.0614645
Activation of RAC1	0.803937	0.811922	0.158797	0.544039	0.952611
Endogenous sterols	0.804832	0.566808	0.469794	0.44753	0.568596
Transport of bile salts and organic acids, metal ions and amine compounds	0.8054	0.683324	0.996413	0.996544	0.608911
Platelet activation, signaling and aggregation	0.806158	0.014089	0.669917	0.793164	0.788446
Conversion from APC/C:Cdc20 to APC/C:Cdh1 in late anaphase	0.807011	0.552999	0.388958	0.240142	0.30009
PTEN Regulation	0.807147	0.986213	0.205538	0.384616	0.82621
CD28 dependent Vav1 pathway	0.807167	0.457421	0.732661	0.807312	0.953425
Deubiquitination	0.80769	0.992589	0.000487384	0.03908	0.0592689
Rab regulation of trafficking	0.810472	0.750711	0.630767	0.61824	0.999804
APC/C:Cdc20 mediated degradation of Cyclin B	0.811222	0.640722	0.649078	0.535716	0.186265
MicroRNA (miRNA) biogenesis	0.811257	0.95235	0.746404	0.858418	0.6308
Death Receptor Signalling	0.814975	0.134927	0.47343	0.474815	0.999549
Notch-HLH transcription pathway	0.81625	0.603345	0.960783	0.971599	0.828612
TP53 Regulates Transcription of DNA Repair Genes	0.816613	0.968509	0.592716	0.534112	0.257129
Activation of HOX genes during differentiation	0.816716	0.989084	0.475858	0.758089	7.39211e-08
NICD traffics to nucleus	0.817689	0.605827	0.960362	0.971753	0.828829
Adherens junctions interactions	0.818051	0.878192	0.946254	0.973302	0.509148
Activation of anterior HOX genes in hindbrain development during early embryogenesis	0.818761	0.989069	0.47958	0.758045	7.57264e-08
Post NMDA receptor activation events	0.818948	0.782518	0.940785	0.935791	0.173557
Stabilization of p53	0.820336	0.952176	0.284484	0.19736	0.581939
NF-kB is activated and signals survival	0.820977	0.778577	0.239176	0.420231	0.979929
Pyruvate metabolism	0.822844	0.514791	0.24057	0.344218	0.344767
p75NTR signals via NF-kB	0.823146	0.782564	0.12883	0.393659	0.975821
Negative regulators of RIG-I/MDA5 signaling	0.823744	0.226156	0.630495	0.227048	0.896632
IRAK2 mediated activation of TAK1 complex	0.824571	0.908543	0.686132	0.563166	0.854676
MET activates RAS signaling	0.824608	0.889329	0.536673	0.73345	0.977704
Pink/Parkin Mediated Mitophagy	0.82652	0.946406	0.635941	0.520547	0.624619
Interleukin-1 family signaling	0.827688	0.668154	0.225131	0.0447359	0.995679
Activation of NMDA receptor and postsynaptic events	0.829184	0.770928	0.928491	0.935032	0.215237
Hemostasis	0.829218	0.000126067	0.926401	0.984603	0.893587
Regulation of KIT signaling	0.829324	0.486532	0.549205	0.443932	0.449535
Recruitment and ATM-mediated phosphorylation of repair and signaling proteins at DNA double strand breaks	0.830067	0.979317	0.767539	0.900843	1.25565e-05
APC/C:Cdc20 mediated degradation of Securin	0.831672	0.8831	0.44248	0.438758	0.431585
Phospholipid metabolism	0.831838	0.96715	0.905417	0.865931	0.854757
Regulation of mRNA stability by proteins that bind AU-rich elements	0.832286	0.786307	0.442609	0.479155	0.443281
NOTCH1 Intracellular Domain Regulates Transcription	0.832681	0.493419	0.946456	0.497716	0.891895
Assembly of active LPL and LIPC lipase complexes	0.833431	0.878535	0.902866	0.937725	0.656949
Prolactin receptor signaling	0.833933	0.588612	0.605689	0.549369	0.856255
Regulation of ornithine decarboxylase (ODC)	0.837054	0.948822	0.252994	0.242262	0.73664
The role of Nef in HIV-1 replication and disease pathogenesis	0.83875	0.878923	0.993676	0.990317	0.95762
GPVI-mediated activation cascade	0.840351	0.0221461	0.586581	0.639755	0.162695
WNT ligand biogenesis and trafficking	0.8414	0.755943	0.950023	0.953159	0.448542
Signaling by BRAF and RAF fusions	0.841583	0.767948	0.72282	0.963635	0.986653
Interleukin-15 signaling	0.842111	0.867932	0.79468	0.786571	0.654568
O-glycosylation of TSR domain-containing proteins	0.843122	0.0799101	0.963275	0.959636	0.933866
ER-Phagosome pathway	0.843311	0.090048	0.690876	0.633382	0.975986
Regulation of pyruvate dehydrogenase (PDH) complex	0.843327	0.359748	0.413993	0.472873	0.150324
Glycosphingolipid metabolism	0.843973	0.966975	0.999983	0.999941	0.968149
RAF-independent MAPK1/3 activation	0.848893	0.738826	0.225371	0.106789	0.755375
Transcriptional regulation of pluripotent stem cells	0.849418	0.609123	0.929896	0.892055	0.797743
HIV Infection	0.849708	0.999799	0.361984	0.33697	0.771175
Regulation of RUNX2 expression and activity	0.849899	0.730364	0.239329	0.157955	0.550747
TICAM1, RIP1-mediated IKK complex recruitment	0.850913	0.93608	0.312846	0.294483	0.975105
Ub-specific processing proteases	0.852435	0.99329	0.00413293	0.128362	0.031996
Autodegradation of the E3 ubiquitin ligase COP1	0.85261	0.954952	0.352205	0.306213	0.62587
Regulation of IFNG signaling	0.85344	0.404201	0.501412	0.65095	0.917581
Synthesis of very long-chain fatty acyl-CoAs	0.855067	0.83723	0.177109	0.410069	0.904964
Regulation of activated PAK-2p34 by proteasome mediated degradation	0.855133	0.958753	0.331336	0.315191	0.624504
Oxygen-dependent proline hydroxylation of Hypoxia-inducible Factor Alpha	0.855308	0.993448	0.451169	0.440018	0.752493
Regulation of signaling by CBL	0.857056	0.313774	0.232481	0.353389	0.733418
Complement cascade	0.858217	0.100052	0.998339	0.999442	0.654065
alpha-linolenic (omega3) and linoleic (omega6) acid metabolism	0.85828	0.936458	0.440489	0.701102	0.872406
Synthesis of active ubiquitin: roles of E1 and E2 enzymes	0.858604	0.949431	0.580161	0.619385	0.944219
alpha-linolenic acid (ALA) metabolism	0.859276	0.936816	0.43756	0.700978	0.873563
Chondroitin sulfate/dermatan sulfate metabolism	0.860321	0.118896	0.882799	0.755232	0.89746
Constitutive Signaling by AKT1 E17K in Cancer	0.860689	0.957533	0.586647	0.880071	0.675206
Trafficking of AMPA receptors	0.861507	0.823195	0.987141	0.999379	0.821732
G-protein beta:gamma signalling	0.862227	0.0490946	0.625565	0.704116	0.846687
Amino acid synthesis and interconversion (transamination)	0.862268	0.970653	0.997366	0.998439	0.888955
Iron uptake and transport	0.863419	0.941869	0.886635	0.854649	0.35222
Regulation of Complement cascade	0.863452	0.12815	0.999491	0.999058	0.695248
Glutamate binding, activation of AMPA receptors and synaptic plasticity	0.863856	0.822875	0.987203	0.999358	0.822127
RNA Polymerase I Chain Elongation	0.863978	0.960183	0.523063	0.664792	2.0544e-08
Interleukin-1 signaling	0.866433	0.922242	0.338442	0.0754147	0.982582
Pyruvate metabolism and Citric Acid (TCA) cycle	0.866938	0.930837	0.976539	0.831027	0.312094
PI3K/AKT Signaling	0.86727	0.979786	0.209602	0.307096	0.984156
PI3K Cascade	0.868534	0.541678	0.189536	0.312031	0.874539
Other interleukin signaling	0.868753	0.435728	0.729274	0.66439	0.842206
Arachidonic acid metabolism	0.871527	0.0995334	0.997469	0.992062	0.826031
Nef-mediates down modulation of cell surface receptors by recruiting them to clathrin adapters	0.871914	0.867618	0.997734	0.99315	0.896729
G beta:gamma signalling through PI3Kgamma	0.872549	0.0664711	0.630845	0.708201	0.830951
TBC/RABGAPs	0.872957	0.939399	0.539417	0.672434	0.995303
Zinc transporters	0.873358	0.652291	0.931226	0.765464	0.624791
Cytochrome P450 - arranged by substrate type	0.874926	0.562617	0.452829	0.416942	0.940964
Neuronal System	0.875492	0.10215	0.999907	0.999998	0.784016
Citric acid cycle (TCA cycle)	0.875762	0.952884	0.984537	0.977298	0.317791
CD28 dependent PI3K/Akt signaling	0.876633	0.919342	0.496479	0.445522	0.498282
Hedgehog ligand biogenesis	0.877764	0.964537	0.508091	0.369454	0.710703
Unblocking of NMDA receptor, glutamate binding and activation	0.878542	0.509939	0.829878	0.715254	0.269114
Influenza Infection	0.878591	0.998595	0.994758	0.994297	0.00472125
TGF-beta receptor signaling activates SMADs	0.878721	0.888434	0.400901	0.529284	0.987987
Regulation of RUNX3 expression and activity	0.879784	0.964544	0.417044	0.281262	0.482262
Interleukin-6 signaling	0.879906	0.401566	0.923895	0.948614	0.444745
TNFR2 non-canonical NF-kB pathway	0.880679	0.112288	0.538475	0.224243	0.918472
C-type lectin receptors (CLRs)	0.881608	0.866553	0.439843	0.311271	0.992037
Influenza Viral RNA Transcription and Replication	0.882393	0.996057	0.999346	0.993266	0.00211577
Sphingolipid metabolism	0.882532	0.993281	0.997095	0.993572	0.992075
Negative epigenetic regulation of rRNA expression	0.882939	0.98805	0.533358	0.465523	1.98186e-08
RET signaling	0.883506	0.610749	0.606889	0.555475	0.746813
HS-GAG degradation	0.884437	0.620135	0.982313	0.992844	0.377517
VEGFR2 mediated cell proliferation	0.884638	0.454691	0.950539	0.980368	0.945745
Formation of the Early Elongation Complex	0.88485	0.9782	0.876598	0.719579	0.774504
Formation of the HIV-1 Early Elongation Complex	0.885467	0.978525	0.878092	0.722308	0.771945
Ras activation upon Ca2+ influx through NMDA receptor	0.886454	0.701937	0.984313	0.984899	0.2048
MAPK6/MAPK4 signaling	0.886916	0.913636	0.2628	0.358192	0.975379
PI Metabolism	0.889088	0.844626	0.23659	0.275344	0.961074
Formation of Fibrin Clot (Clotting Cascade)	0.889352	0.0129441	0.873648	0.94201	0.0677849
Role of phospholipids in phagocytosis	0.891057	0.312113	0.970344	0.940791	0.666349
Myogenesis	0.891261	0.610174	0.923876	0.977161	0.933674
Transcriptional regulation by RUNX2	0.891368	0.875569	0.292232	0.433801	0.741836
CDO in myogenesis	0.891599	0.612159	0.924871	0.977301	0.932883
Aflatoxin activation and detoxification	0.891625	0.0447611	0.979451	0.988979	0.893433
Plasma lipoprotein clearance	0.891996	0.619948	0.964335	0.923472	0.824454
Negative regulation of MAPK pathway	0.892289	0.992755	0.461864	0.411056	0.997463
Vpu mediated degradation of CD4	0.892644	0.976356	0.430543	0.350762	0.779651
Phase 0 - rapid depolarisation	0.893378	0.242496	0.998696	0.998281	0.876949
Signaling by VEGF	0.893725	0.349639	0.899429	0.944361	0.969168
Amine-derived hormones	0.895047	0.0673019	0.805625	0.8173	0.137137
Common Pathway of Fibrin Clot Formation	0.898529	0.0194127	0.603587	0.922927	0.389397
Interleukin-12 signaling	0.898896	0.181037	0.882791	0.982276	0.663142
FGFR1 mutant receptor activation	0.899272	0.921432	0.790349	0.78105	0.808482
EPH-Ephrin signaling	0.900966	0.926449	0.921249	0.995149	0.975307
Vif-mediated degradation of APOBEC3G	0.901026	0.919268	0.353227	0.366303	0.523707
NCAM1 interactions	0.901353	0.344461	0.993862	0.99507	0.515427
Interleukin-12 family signaling	0.901667	0.197985	0.93823	0.995601	0.55997
Protein ubiquitination	0.901915	0.998937	0.320253	0.367951	0.0133022
FCERI mediated NF-kB activation	0.902077	0.992286	0.218464	0.108453	0.850509
Signaling by Hedgehog	0.902543	0.972226	0.548173	0.595071	0.946938
Peroxisomal protein import	0.902573	0.352043	0.918897	0.938063	0.935294
Autodegradation of Cdh1 by Cdh1:APC/C	0.902633	0.921725	0.488579	0.512722	0.295729
MET activates PTK2 signaling	0.902816	0.213687	0.980817	0.990026	0.980175
PI3K events in ERBB2 signaling	0.902821	0.587059	0.229985	0.177792	0.219315
Post-translational modification: synthesis of GPI-anchored proteins	0.903317	0.776311	0.998539	0.909921	0.96333
VEGFA-VEGFR2 Pathway	0.903428	0.438479	0.91133	0.964847	0.961351
E3 ubiquitin ligases ubiquitinate target proteins	0.904846	0.993853	0.447245	0.29734	0.0077577
Transferrin endocytosis and recycling	0.905406	0.833775	0.818296	0.885524	0.887728
Glucagon-like Peptide-1 (GLP1) regulates insulin secretion	0.905543	0.802172	0.904444	0.997942	0.938077
Meiotic synapsis	0.905705	0.95112	0.447403	0.813696	6.74675e-06
NoRC negatively regulates rRNA expression	0.906484	0.985657	0.628523	0.571771	1.5442e-08
IL-6-type cytokine receptor ligand interactions	0.907195	0.801012	0.891781	0.940981	0.951247
Ubiquitin-dependent degradation of Cyclin D	0.907287	0.917774	0.280367	0.32458	0.638837
RUNX3 regulates NOTCH signaling	0.908583	0.831239	0.685648	0.693356	0.90632
Ubiquitin-dependent degradation of Cyclin D1	0.908677	0.916959	0.281414	0.322116	0.640269
Biotin transport and metabolism	0.909502	0.807192	0.999718	0.998587	0.0763731
MAPK3 (ERK1) activation	0.91086	0.478779	0.850048	0.694337	0.413858
Mitophagy	0.911527	0.948598	0.675634	0.422202	0.805835
Activation of DNA fragmentation factor	0.913396	0.927949	0.883407	0.629301	0.423278
WNT5A-dependent internalization of FZD2, FZD5 and ROR2	0.913596	0.718006	0.851165	0.907185	0.591738
Influenza Life Cycle	0.913949	0.997997	0.998795	0.99652	0.00321099
Apoptosis induced DNA fragmentation	0.914686	0.927301	0.883759	0.626611	0.423088
Signaling by Non-Receptor Tyrosine Kinases	0.915027	0.919871	0.84866	0.822021	0.852497
Signaling by PTK6	0.915797	0.919699	0.850141	0.822379	0.852889
Transcriptional activity of SMAD2/SMAD3:SMAD4 heterotrimer	0.915831	0.406095	0.494666	0.68584	0.999726
Intracellular signaling by second messengers	0.91656	0.981722	0.412067	0.509287	0.995371
Pre-NOTCH Transcription and Translation	0.918754	0.873815	0.860574	0.973268	0.831199
Degradation of AXIN	0.919271	0.986125	0.252742	0.237622	0.95331
ECM proteoglycans	0.919477	0.15283	0.996994	0.999715	0.8799
RNA Polymerase I Transcription	0.919621	0.971956	0.930101	0.861132	3.28299e-08
Glycogen metabolism	0.920293	0.892577	0.998589	0.998037	0.663401
Rap1 signalling	0.92044	0.17858	0.763037	0.845909	0.938742
Hh mutants abrogate ligand secretion	0.920989	0.9779	0.364005	0.314724	0.8475
Macroautophagy	0.921216	0.994311	0.2522	0.430065	0.929864
Hh mutants that don't undergo autocatalytic processing are degraded by ERAD	0.921813	0.978545	0.363476	0.315768	0.848528
HIV Transcription Elongation	0.923029	0.983303	0.809861	0.7627	0.744028
Retrograde neurotrophin signalling	0.923251	0.921143	0.968252	0.943696	0.678094
Biosynthesis of specialized proresolving mediators (SPMs)	0.924352	0.312898	0.99514	0.992152	0.848949
Signaling by Interleukins	0.924496	0.00196154	0.654537	0.283108	0.712679
Formation of HIV-1 elongation complex containing HIV-1 Tat	0.924687	0.983385	0.809166	0.76239	0.744341
Tat-mediated elongation of the HIV-1 transcript	0.925082	0.983358	0.808116	0.761299	0.745485
Oncogenic MAPK signaling	0.925207	0.818435	0.703333	0.94952	0.996855
Interleukin-10 signaling	0.925285	5.04936e-06	0.52525	0.311204	0.859737
Synthesis of IP3 and IP4 in the cytosol	0.92626	0.727411	0.92928	0.957709	0.558924
Platelet calcium homeostasis	0.926645	0.622559	0.975891	0.989955	0.592844
Triglyceride biosynthesis	0.927144	0.878734	0.530984	0.800253	0.580195
mRNA Capping	0.927178	0.98521	0.870032	0.776657	0.971817
Degradation of GLI1 by the proteasome	0.927218	0.97457	0.277346	0.356797	0.891757
Neurotransmitter receptors and postsynaptic signal transmission	0.928182	0.539638	0.99721	0.999848	0.462806
Collagen biosynthesis and modifying enzymes	0.928329	0.0233712	1	1	0.877417
Membrane binding and targetting of GAG proteins	0.928359	0.651131	0.756949	0.610119	0.77045
RNA Polymerase I Promoter Clearance	0.92857	0.96955	0.939309	0.873639	2.41813e-08
Synthesis And Processing Of GAG, GAGPOL Polyproteins	0.929486	0.650897	0.759483	0.606348	0.766491
Pre-NOTCH Expression and Processing	0.929977	0.282736	0.71684	0.973658	0.956266
TP53 Regulates Transcription of Death Receptors and Ligands	0.932179	0.465041	0.350367	0.493831	0.60116
Downstream signaling of activated FGFR1	0.932517	0.295074	0.452004	0.536213	0.857742
Interleukin-27 signaling	0.932721	0.890831	0.981279	0.994339	0.523442
PI3K/AKT Signaling in Cancer	0.934483	0.328066	0.735042	0.699865	0.552322
Semaphorin interactions	0.934597	0.507685	0.980895	0.981427	0.999616
mRNA decay by 5' to 3' exoribonuclease	0.935119	0.736672	0.799089	0.596609	0.159155
Transmission across Chemical Synapses	0.935168	0.654029	0.999905	0.999999	0.665156
TCR signaling	0.935277	0.886934	0.411839	0.229047	0.651075
Histidine, lysine, phenylalanine, tyrosine, proline and tryptophan catabolism	0.93543	0.170411	0.996753	0.995992	0.730338
PECAM1 interactions	0.935458	0.226306	0.722217	0.555434	0.457754
Interleukin-20 family signaling	0.935954	0.843373	0.962753	0.908791	0.0119479
Defective CFTR causes cystic fibrosis	0.936552	0.975363	0.473695	0.333246	0.370541
Binding and Uptake of Ligands by Scavenger Receptors	0.936612	0.531215	0.99966	0.999885	0.0676489
Metabolism of fat-soluble vitamins	0.936765	0.670732	0.996186	0.999588	0.363316
Retinoid metabolism and transport	0.937726	0.670244	0.996188	0.999601	0.364234
Hedgehog 'off' state	0.937801	0.981783	0.404093	0.56872	0.917637
Signaling by FGFR2 in disease	0.939463	0.967344	0.542274	0.636815	0.896905
G alpha (s) signalling events	0.939974	0.000723707	0.933972	0.77532	0.148724
Signaling by SCF-KIT	0.940116	0.493347	0.503202	0.360655	0.858028
Assembly Of The HIV Virion	0.940722	0.747424	0.811047	0.630664	0.805843
Pausing and recovery of Tat-mediated HIV elongation	0.940874	0.983302	0.723779	0.822957	0.66395
Tat-mediated HIV elongation arrest and recovery	0.940978	0.983722	0.725175	0.822897	0.663534
Disorders of transmembrane transporters	0.941025	0.975576	0.454069	0.327142	0.223503
ABC transporter disorders	0.941027	0.975316	0.477242	0.344881	0.234908
Processing of SMDT1	0.941513	0.914107	0.841351	0.971501	0.39071
PCP/CE pathway	0.942237	0.993678	0.741878	0.570426	0.897554
Beta-catenin independent WNT signaling	0.942651	0.989247	0.774861	0.903814	0.997272
Recycling pathway of L1	0.942969	0.925789	0.985301	0.99242	0.641132
Fc epsilon receptor (FCERI) signaling	0.943225	0.89026	0.203672	0.154364	0.975214
Signaling by cytosolic FGFR1 fusion mutants	0.943377	0.936295	0.840588	0.812373	0.695829
Metalloprotease DUBs	0.94415	0.929351	0.520225	0.565791	0.00657005
Signaling by TGF-beta Receptor Complex	0.944206	0.651337	0.308205	0.631853	0.999785
Ionotropic activity of kainate receptors	0.944339	0.598439	0.990033	0.996477	0.56654
Activation of Ca-permeable Kainate Receptor	0.944495	0.59876	0.990003	0.996557	0.568044
Miscellaneous transport and binding events	0.944644	0.909772	0.557833	0.644629	0.356696
PD-1 signaling	0.944673	0.036037	0.644506	0.927567	0.153941
Senescence-Associated Secretory Phenotype (SASP)	0.944696	0.979819	0.72555	0.790172	5.74779e-08
Physiological factors	0.944861	0.333781	0.740112	0.833197	0.0256582
Post-chaperonin tubulin folding pathway	0.945588	0.844864	0.873335	0.839313	0.856359
RUNX1 regulates transcription of genes involved in differentiation of HSCs	0.946237	0.914925	0.437527	0.535146	3.84724e-06
PIWI-interacting RNA (piRNA) biogenesis	0.946265	0.890538	0.909427	0.907285	0.975014
Negative regulation of MET activity	0.946291	0.937655	0.587913	0.47996	0.956084
CD28 co-stimulation	0.946359	0.835744	0.530821	0.55356	0.695014
Translocation of GLUT4 to the plasma membrane	0.946881	0.991563	0.676614	0.902597	0.585718
Cell junction organization	0.947004	0.705199	0.997955	0.994099	0.984249
HSF1 activation	0.947054	0.94323	0.840458	0.979952	0.18813
Constitutive Signaling by EGFRvIII	0.947117	0.922645	0.524121	0.793393	0.915258
SHC1 events in ERBB2 signaling	0.948064	0.423447	0.48969	0.753731	0.282673
RNA Polymerase II Transcription Pre-Initiation And Promoter Opening	0.948175	0.997311	0.334337	0.348707	0.952012
Signaling by EGFRvIII in Cancer	0.948556	0.923167	0.526707	0.794601	0.914654
RNA Polymerase II HIV Promoter Escape	0.948614	0.997422	0.33342	0.348908	0.952677
GPCR ligand binding	0.948718	1.89699e-07	0.999176	0.999786	0.564973
HIV Transcription Initiation	0.948842	0.997294	0.336018	0.350159	0.952282
Trafficking of GluR2-containing AMPA receptors	0.948871	0.790856	0.945316	0.994587	0.83642
RNA Polymerase II Transcription Initiation	0.948873	0.997311	0.334237	0.350238	0.95172
RNA Polymerase II Transcription Initiation And Promoter Clearance	0.949144	0.997266	0.333188	0.348296	0.951944
RNA Polymerase II Promoter Escape	0.949437	0.997164	0.335153	0.350188	0.95226
Golgi Associated Vesicle Biogenesis	0.950328	0.986698	0.969259	0.998507	0.956848
Ovarian tumor domain proteases	0.950818	0.776426	0.0465088	0.0115501	0.895989
Clathrin derived vesicle budding	0.95099	0.971191	0.982125	0.999391	0.991276
ABC-family proteins mediated transport	0.951172	0.994493	0.624342	0.620251	0.847766
trans-Golgi Network Vesicle Budding	0.951287	0.971013	0.981962	0.999382	0.991217
Synthesis, secretion, and inactivation of Glucose-dependent Insulinotropic Polypeptide (GIP)	0.952032	0.77068	0.968267	0.991746	0.125247
EGFR downregulation	0.952399	0.944008	0.663558	0.542281	0.813912
ESR-mediated signaling	0.954221	0.855927	0.786032	0.94083	1.0716e-07
Metabolism of steroid hormones	0.95443	0.338064	0.945943	0.980452	0.957861
MAP3K8 (TPL2)-dependent MAPK1/3 activation	0.954768	0.81575	0.53747	0.239907	0.934818
CREB phosphorylation through the activation of CaMKII	0.955082	0.888807	0.984605	0.995536	0.242628
IRS-mediated signalling	0.955099	0.636257	0.310097	0.360934	0.895545
CTLA4 inhibitory signaling	0.955503	0.944201	0.849065	0.707974	0.958482
RNA Pol II CTD phosphorylation and interaction with CE during HIV infection	0.956081	0.98196	0.905858	0.805913	0.986517
RNA Pol II CTD phosphorylation and interaction with CE	0.956288	0.982	0.904874	0.805625	0.986823
Signaling by FGFR2	0.956329	0.993126	0.506209	0.584149	0.613744
Lipoprotein metabolism	0.95641	0.709271	0.997562	0.998692	0.863879
Peptide hormone metabolism	0.9565	0.601349	0.995913	0.990831	0.766879
Signaling by TGF-beta family members	0.95669	0.689923	0.506879	0.676409	0.996528
Collagen formation	0.956919	0.0224577	1	1	0.86142
Platelet Adhesion to exposed collagen	0.956924	0.876345	0.982128	0.992349	0.273173
Ion homeostasis	0.957214	0.806981	0.995308	0.999781	0.464584
Interleukin-6 family signaling	0.957224	0.359037	0.956168	0.976782	0.84652
PI-3K cascade:FGFR1	0.957378	0.0843664	0.438562	0.352958	0.717113
Signaling by Type 1 Insulin-like Growth Factor 1 Receptor (IGF1R)	0.957444	0.644496	0.196778	0.314038	0.924793
InlB-mediated entry of Listeria monocytogenes into host cell	0.958072	0.925002	0.776886	0.563284	0.977507
RUNX1 regulates genes involved in megakaryocyte differentiation and platelet function	0.958223	0.909872	0.848996	0.90663	3.67372e-08
Insulin receptor signalling cascade	0.958232	0.73413	0.323617	0.431379	0.925941
IGF1R signaling cascade	0.958447	0.642961	0.196234	0.311961	0.921184
Signaling by Nuclear Receptors	0.958824	0.599538	0.808844	0.888831	3.33217e-06
Incretin synthesis, secretion, and inactivation	0.958913	0.717801	0.930615	0.939689	0.221718
Degradation of GLI2 by the proteasome	0.959099	0.973099	0.306967	0.28151	0.726967
DCC mediated attractive signaling	0.959115	0.642348	0.737315	0.662543	0.884175
Keratinization	0.959321	0.381692	0.993159	0.998592	0.000354795
PRC2 methylates histones and DNA	0.959764	0.962549	0.832323	0.928582	2.27431e-07
Formation of the cornified envelope	0.959777	0.50472	0.992118	0.999817	0.0332159
MET activates RAP1 and RAC1	0.960704	0.889706	0.512343	0.641531	0.956029
B Cell Activation	0.961109	0.791507	0.304231	0.193636	0.9996
FRS-mediated FGFR1 signaling	0.9613	0.130386	0.648248	0.667519	0.729301
MAP2K and MAPK activation	0.961474	0.53521	0.755167	0.904417	0.886189
GLI3 is processed to GLI3R by the proteasome	0.96169	0.97381	0.293614	0.293619	0.820012
Metabolism of polyamines	0.962486	0.97058	0.600086	0.692135	0.801242
Transcriptional regulation by RUNX3	0.963888	0.939013	0.698226	0.88929	0.993798
Fatty acid metabolism	0.964068	0.303286	0.999991	0.999732	0.855884
Sema4D in semaphorin signaling	0.964252	0.858326	0.845463	0.887805	0.988468
Metabolism of Angiotensinogen to Angiotensins	0.964398	0.272362	0.968943	0.994365	0.220362
Receptor Mediated Mitophagy	0.964979	0.9085	0.724246	0.785839	0.92786
Activation of NF-kappaB in B cells	0.965176	0.965505	0.294418	0.132641	0.801764
IRS-related events triggered by IGF1R	0.965293	0.623746	0.284069	0.356127	0.910356
PTK6 Regulates RHO GTPases, RAS GTPase and MAP kinases	0.965808	0.902445	0.378101	0.726728	0.903599
Regulation of actin dynamics for phagocytic cup formation	0.965964	0.388143	0.898577	0.926054	0.924101
Transcription of the HIV genome	0.966131	0.999196	0.534833	0.608321	0.955423
RAF activation	0.96705	0.961709	0.422093	0.641559	0.987656
Insulin receptor recycling	0.967095	0.901864	0.861974	0.901499	0.770762
Cargo concentration in the ER	0.968107	0.933526	0.518104	0.284415	0.912256
Estrogen-dependent gene expression	0.970181	0.817488	0.793264	0.933137	6.22287e-08
Listeria monocytogenes entry into host cells	0.970505	0.93855	0.811209	0.453587	0.973033
Integrin cell surface interactions	0.970633	0.318374	0.999999	1	0.888232
Downregulation of ERBB2 signaling	0.970969	0.583701	0.91262	0.952196	0.310066
Signaling by FGFR	0.971287	0.949333	0.55732	0.592085	0.762698
DNA methylation	0.972456	0.937746	0.897323	0.915256	3.78961e-07
WNT5A-dependent internalization of FZD4	0.973136	0.92891	0.968795	0.99492	0.878973
Negative regulation of FGFR1 signaling	0.974157	0.295162	0.870282	0.510102	0.91058
Cardiac conduction	0.974172	0.112088	0.997101	0.997012	0.128884
Striated Muscle Contraction	0.974195	0.771081	0.998067	0.999969	0.503573
MET promotes cell motility	0.975204	0.350982	0.915123	0.889942	0.995135
Formation of TC-NER Pre-Incision Complex	0.975466	0.996539	0.922207	0.890365	0.702679
Synthesis, secretion, and inactivation of Glucagon-like Peptide-1 (GLP-1)	0.976085	0.699633	0.941472	0.967049	0.886237
Triglyceride metabolism	0.976123	0.892148	0.827855	0.967586	0.412873
Costimulation by the CD28 family	0.976241	0.74257	0.903926	0.651402	0.438763
COPII-mediated vesicle transport	0.976494	0.996113	0.569075	0.547219	0.996444
RNA Polymerase II Pre-transcription Events	0.97657	0.999534	0.270674	0.358455	0.9452
Branched-chain amino acid catabolism	0.977064	0.880251	0.999197	0.999966	0.0429264
Mitochondrial Fatty Acid Beta-Oxidation	0.977173	0.561941	0.99564	0.998884	0.510578
Gamma carboxylation, hypusine formation and arylsulfatase activation	0.977338	0.737001	0.988755	0.948682	0.889954
Sema4D induced cell migration and growth-cone collapse	0.977618	0.84831	0.870298	0.901156	0.972834
Downstream TCR signaling	0.978146	0.991135	0.359471	0.227046	0.278071
Formation of HIV elongation complex in the absence of HIV Tat	0.978225	0.991686	0.817896	0.776303	0.773854
Synthesis of PIPs at the plasma membrane	0.978427	0.713213	0.251882	0.239285	0.550653
Signaling by NTRK1 (TRKA)	0.978521	0.966657	0.762675	0.71365	0.997044
SIRT1 negatively regulates rRNA expression	0.978542	0.943186	0.761711	0.808312	6.94356e-08
Olfactory Signaling Pathway	0.978802	2.28613e-05	0.629768	0.279505	0.00692002
Neddylation	0.978945	0.996243	0.0394753	0.0376729	0.931525
Cargo recognition for clathrin-mediated endocytosis	0.978959	0.968052	0.910063	0.832803	0.507243
Downregulation of ERBB2:ERBB3 signaling	0.979355	0.86263	0.839273	0.878262	0.273467
Fcgamma receptor (FCGR) dependent phagocytosis	0.979957	0.382361	0.926164	0.902891	0.967118
Downstream signaling of activated FGFR2	0.980765	0.852962	0.404672	0.556112	0.808709
Signaling by high-kinase activity BRAF mutants	0.980892	0.5255	0.554155	0.890763	0.884975
NCAM signaling for neurite out-growth	0.980907	0.859572	0.990754	0.986154	0.685059
Antimicrobial peptides	0.981237	4.86072e-05	0.508199	0.391165	0.59891
PI-3K cascade:FGFR2	0.981547	0.729815	0.664093	0.453947	0.734696
Glycogen breakdown (glycogenolysis)	0.982431	0.923034	0.999493	0.99988	0.939852
Ion transport by P-type ATPases	0.9825	0.922689	0.991452	0.999387	0.156047
Signaling by WNT	0.982596	0.99982	0.767009	0.927691	0.00240338
Downstream signaling events of B Cell Receptor (BCR)	0.982714	0.988767	0.47896	0.243351	0.949686
Packaging Of Telomere Ends	0.982894	0.937663	0.558653	0.86533	1.47209e-05
mitochondrial fatty acid beta-oxidation of saturated fatty acids	0.983323	0.868998	0.988092	0.999802	0.794953
Activation of rRNA Expression by ERCC6 (CSB) and EHMT2 (G9a)	0.98397	0.972846	0.977563	0.967138	5.35339e-08
Immunoregulatory interactions between a Lymphoid and a non-Lymphoid cell	0.984058	0.027122	0.999944	0.999935	0.966226
ERK1/ERK2 pathway	0.984454	0.772546	0.712958	0.583479	0.969251
Retrograde transport at the Trans-Golgi-Network	0.984904	0.899728	0.589933	0.72562	0.994244
MAPK family signaling cascades	0.98517	0.723419	0.571433	0.522954	0.988306
The activation of arylsulfatases	0.985177	0.883413	0.993981	0.999841	0.90115
Antigen processing: Ubiquitination & Proteasome degradation	0.985365	0.999087	0.000272993	0.00228929	0.999999
Platelet Aggregation (Plug Formation)	0.985383	0.248	0.910023	0.851987	0.466312
RAF/MAP kinase cascade	0.985506	0.831659	0.67506	0.562065	0.985866
Class I MHC mediated antigen processing & presentation	0.985614	0.954483	0.00110422	0.00832379	1
RHO GTPases activate KTN1	0.985756	0.898179	0.75356	0.914713	0.899896
Activated NTRK2 signals through FRS2 and FRS3	0.985997	0.853381	0.733867	0.753204	0.788026
Signaling by NTRKs	0.986253	0.975833	0.723808	0.765368	0.999754
Regulation of RUNX1 Expression and Activity	0.986334	0.392046	0.828317	0.960542	0.885258
Formation of RNA Pol II elongation complex	0.986411	0.997255	0.469046	0.583313	0.811739
RNA Polymerase II Transcription Elongation	0.986413	0.997395	0.472433	0.585075	0.812782
LDL clearance	0.986518	0.938904	0.981268	0.963491	0.386256
FRS-mediated FGFR3 signaling	0.986676	0.821633	0.678406	0.787241	0.676003
Pausing and recovery of HIV elongation	0.986752	0.990721	0.748056	0.842681	0.690461
IRE1alpha activates chaperones	0.986901	0.994204	0.931761	0.936961	0.994038
HIV elongation arrest and recovery	0.986916	0.990847	0.751239	0.844699	0.688975
Downstream signaling of activated FGFR4	0.987334	0.862448	0.443249	0.597692	0.800596
Initial triggering of complement	0.987341	0.266768	0.96814	0.994021	0.719189
Negative regulation of FGFR2 signaling	0.987409	0.842506	0.939171	0.673879	0.905922
Cholesterol biosynthesis	0.987918	0.98454	1	1	0.118248
Signalling to ERKs	0.988207	0.873404	0.834243	0.929088	0.974838
Integrin alphaIIb beta3 signaling	0.988318	0.253835	0.823837	0.720491	0.88434
PI-3K cascade:FGFR3	0.988337	0.786023	0.578909	0.505757	0.657594
Integrin signaling	0.988538	0.252794	0.824596	0.720098	0.884463
RHO GTPases Activate WASPs and WAVEs	0.988937	0.754108	0.936802	0.938004	0.999087
Synthesis of Leukotrienes (LT) and Eoxins (EX)	0.988977	0.222296	0.999149	0.998921	0.428286
Downstream signaling of activated FGFR3	0.989079	0.876269	0.23763	0.382453	0.76904
Signaling by Insulin receptor	0.989118	0.893304	0.61724	0.715145	0.968709
Negative regulation of FGFR4 signaling	0.989483	0.860231	0.948633	0.693152	0.919069
RHO GTPases activate IQGAPs	0.989533	0.939295	0.938457	0.941505	0.96612
PI-3K cascade:FGFR4	0.990503	0.749149	0.759102	0.677968	0.705043
XBP1(S) activates chaperone genes	0.990708	0.993753	0.935435	0.939098	0.997329
FRS-mediated FGFR2 signaling	0.990808	0.767799	0.887424	0.839079	0.745432
TNFR1-induced NFkappaB signaling pathway	0.991023	0.530981	0.547704	0.767755	0.962961
Spry regulation of FGF signaling	0.991382	0.849996	0.924945	0.604718	0.964353
EPHB-mediated forward signaling	0.991449	0.930209	0.774742	0.915651	0.523576
Plasma lipoprotein assembly	0.99168	0.677289	0.878121	0.995902	0.450509
COPI-dependent Golgi-to-ER retrograde traffic	0.991752	0.998265	0.867602	0.928463	0.490283
Paradoxical activation of RAF signaling by kinase inactive BRAF	0.99216	0.658395	0.73796	0.774773	0.90754
Signaling by FGFR1	0.992188	0.682916	0.643023	0.512881	0.972798
Signaling by moderate kinase activity BRAF mutants	0.992239	0.656648	0.737987	0.774629	0.906821
Nephrin family interactions	0.992385	0.903238	0.586152	0.495699	0.959491
Signaling by FGFR1 in disease	0.992487	0.945128	0.749803	0.819256	0.864555
Golgi-to-ER retrograde transport	0.992718	0.999687	0.816274	0.864046	0.841977
Activation of the mRNA upon binding of the cap-binding complex and eIFs, and subsequent binding to 43S	0.99278	0.978534	0.999998	0.999991	0.0395664
Activation of gene expression by SREBF (SREBP)	0.992829	0.976631	0.998673	0.978762	0.611569
Metabolism of steroids	0.992895	0.976526	0.999819	0.99952	0.979554
Signaling by FGFR3 fusions in cancer	0.99308	0.904103	0.336946	0.558695	0.77616
GRB2:SOS provides linkage to MAPK signaling for Integrins	0.993235	0.466168	0.842031	0.767819	0.652773
Negative regulation of FGFR3 signaling	0.9933	0.889182	0.877104	0.56815	0.903919
Cell-extracellular matrix interactions	0.99384	0.784118	0.999886	0.999132	0.946961
FRS-mediated FGFR4 signaling	0.994172	0.788239	0.91829	0.932549	0.721234
Clathrin-mediated endocytosis	0.994253	0.995842	0.920487	0.765105	0.803335
Signaling by ERBB2	0.994262	0.813706	0.853764	0.893641	0.688892
Prolonged ERK activation events	0.994395	0.902083	0.703921	0.757072	0.80702
Signaling by FGFR3 point mutants in cancer	0.99441	0.853549	0.245904	0.499689	0.702376
Molecules associated with elastic fibres	0.99441	0.838915	0.949478	0.85833	0.862823
Signaling by FGFR3 in disease	0.994597	0.853902	0.246802	0.500113	0.702428
Fatty acyl-CoA biosynthesis	0.994723	0.933703	0.970689	0.991462	0.918781
Signaling by ROBO receptors	0.994996	0.998092	0.985167	0.958685	0.939972
Regulation of expression of SLITs and ROBOs	0.995089	0.999941	0.995186	0.973336	0.314308
Signaling by EGFR	0.995396	0.972005	0.582362	0.482569	0.949174
Infectious disease	0.995398	0.999998	0.939548	0.913166	0.693717
L1CAM interactions	0.99543	0.971793	0.996627	0.992135	0.944636
TP53 Regulates Metabolic Genes	0.995448	0.985338	0.950013	0.981589	0.629044
Signaling by FGFR4 in disease	0.995508	0.887987	0.452376	0.605228	0.783322
Activated PKN1 stimulates transcription of AR (androgen receptor) regulated genes KLK2 and KLK3	0.995956	0.937263	0.954145	0.976175	6.04809e-08
TNF signaling	0.996317	0.668411	0.761055	0.677897	0.991128
Signaling by Receptor Tyrosine Kinases	0.996328	0.8563	0.901022	0.899727	0.999973
Signaling by PDGF	0.996529	0.598069	0.930556	0.886746	0.836329
Cell-Cell communication	0.996604	0.513515	0.989468	0.971404	0.935392
RNA Polymerase I Promoter Opening	0.996745	0.937723	0.971217	0.966759	1.1594e-07
The citric acid (TCA) cycle and respiratory electron transport	0.996872	0.997069	0.999996	0.999994	0.399382
Transcriptional regulation by RUNX1	0.997145	0.956425	0.648506	0.800322	0.000521799
Signaling by RAS mutants	0.997166	0.664492	0.721452	0.790962	0.980039
Regulation of cholesterol biosynthesis by SREBP (SREBF)	0.997365	0.993682	0.994118	0.936241	0.584873
Translation initiation complex formation	0.997517	0.976808	0.999998	0.999993	0.0431356
Regulation of TNFR1 signaling	0.99753	0.512498	0.84622	0.817581	0.989828
HDACs deacetylate histones	0.997551	0.985552	0.997422	0.975533	9.44106e-10
Downstream signal transduction	0.997551	0.902621	0.750346	0.560346	0.761902
EPHA-mediated growth cone collapse	0.997584	0.919117	0.899142	0.912465	0.984059
Signaling by EGFR in Cancer	0.997614	0.945158	0.682227	0.767885	0.935221
Signaling by Ligand-Responsive EGFR Variants in Cancer	0.99762	0.945102	0.682935	0.766628	0.934544
Ribosomal scanning and start codon recognition	0.997653	0.977432	0.999998	0.999993	0.0448608
Complex I biogenesis	0.997675	0.670532	0.999904	0.999831	0.15495
Constitutive Signaling by Ligand-Responsive EGFR Cancer Variants	0.997742	0.944724	0.682414	0.767316	0.934666
Metabolism of nitric oxide	0.997839	0.928543	0.997486	0.99971	0.716951
eNOS activation and regulation	0.997878	0.928857	0.997593	0.999716	0.71645
Stimuli-sensing channels	0.998036	0.605203	0.993158	0.998679	0.985651
p130Cas linkage to MAPK signaling for integrins	0.998201	0.464256	0.890422	0.818217	0.714606
Signaling by FGFR in disease	0.998246	0.988398	0.828678	0.732122	0.911266
Downregulation of SMAD2/3:SMAD4 transcriptional activity	0.99834	0.617504	0.451028	0.842122	0.980853
Respiratory electron transport, ATP synthesis by chemiosmotic coupling, and heat production by uncoupling proteins.	0.998424	0.971725	0.999977	0.999992	0.54555
GAB1 signalosome	0.998484	0.685581	0.522244	0.540248	0.841802
Signaling by FGFR4	0.998547	0.951694	0.649664	0.520453	0.961674
Respiratory electron transport	0.998628	0.861123	0.999993	0.999996	0.0804666
Signaling by FGFR3	0.998802	0.958472	0.558156	0.458786	0.953104
RHO GTPases Activate ROCKs	0.998902	0.901455	0.931487	0.916727	0.996572
Intrinsic Pathway of Fibrin Clot Formation	0.999029	0.892309	0.999885	0.999917	0.0507896
Intra-Golgi traffic	0.999034	0.917162	0.450364	0.517142	0.794079
Phosphorylation of CD3 and TCR zeta chains	0.999073	0.459288	0.993401	0.999621	0.0516725
TGF-beta receptor signaling in EMT (epithelial to mesenchymal transition)	0.999097	0.690225	0.929362	0.541437	0.708905
Translocation of ZAP-70 to Immunological synapse	0.999335	0.618436	0.999097	0.999648	0.0706079
Diseases of signal transduction	0.999424	0.997363	0.962073	0.952291	0.99997
Ion channel transport	0.999427	0.760395	0.999528	0.999759	0.952801
Muscle contraction	0.999601	0.435273	0.999994	1	0.219362
RHO GTPases activate CIT	0.999664	0.896597	0.963695	0.994597	0.769349
Intra-Golgi and retrograde Golgi-to-ER traffic	0.999678	0.999798	0.545592	0.70714	0.997151
Nonsense-Mediated Decay (NMD)	0.999692	0.999164	0.999927	0.998899	0.00851216
Nonsense Mediated Decay (NMD) enhanced by the Exon Junction Complex (EJC)	0.999703	0.999195	0.999926	0.998902	0.0085764
Elastic fibre formation	0.99971	0.836437	0.994866	0.980456	0.868319
Smooth Muscle Contraction	0.999719	0.906228	0.999967	0.999915	0.955993
Signaling by NODAL	0.99973	0.889839	0.995918	0.999227	0.885545
Formation of the ternary complex, and subsequently, the 43S complex	0.999773	0.968038	1	0.999999	0.0418713
Selenoamino acid metabolism	0.999848	0.998462	1	1	0.00489806
Amyloid fiber formation	0.999874	0.964943	0.970077	0.954316	2.0275e-08
RHO GTPases activate PAKs	0.999903	0.949842	0.996625	0.996787	0.987267
Signaling by MET	0.999906	0.956108	0.689632	0.606698	0.999979
Axon guidance	0.999923	0.999332	0.998916	0.998791	0.998299
Antigen Presentation: Folding, assembly and peptide loading of class I MHC	0.999924	0.968944	0.991045	0.984463	0.825603
Asparagine N-linked glycosylation	0.999939	0.999927	0.951912	0.581586	0.999585
N-glycan trimming in the ER and Calnexin/Calreticulin cycle	0.999945	0.992432	0.997001	0.970361	0.931936
Post-translational protein phosphorylation	0.999952	0.603318	1	1	0.787293
ER Quality Control Compartment (ERQC)	0.999959	0.969591	0.969833	0.954206	0.98485
COPI-mediated anterograde transport	0.999967	0.99754	0.955209	0.878691	0.999933
Amino acid and derivative metabolism	0.999969	0.999325	1	1	0.443587
MHC class II antigen presentation	0.999969	0.999219	0.762353	0.984004	0.347359
Cap-dependent Translation Initiation	0.999975	0.997804	1	1	0.00370436
Eukaryotic Translation Initiation	0.999976	0.997773	1	1	0.00371788
Collagen degradation	0.999984	0.504636	0.999018	0.999997	0.40545
Selenocysteine synthesis	0.999988	0.991905	1	0.999999	0.00749805
Trafficking and processing of endosomal TLR	0.999989	0.773882	0.999933	0.999959	0.949153
Nonsense Mediated Decay (NMD) independent of the Exon Junction Complex (EJC)	0.99999	0.992305	1	1	0.00573119
Regulation of IGF Activity by IGFBP	0.999992	0.678224	1	1	0.580269
Calnexin/calreticulin cycle	0.999993	0.984333	0.997935	0.996372	0.965688
RHO GTPases activate PKNs	0.999993	0.981549	0.962067	0.981984	3.10466e-08
GTP hydrolysis and joining of the 60S ribosomal subunit	0.999994	0.996347	1	1	0.00582073
L13a-mediated translational silencing of Ceruloplasmin expression	0.999996	0.98989	1	1	0.00428345
Viral mRNA Translation	0.999996	0.93641	1	1	0.007153
ER to Golgi Anterograde Transport	0.999997	0.999898	0.886281	0.726479	0.999994
Activation of Matrix Metalloproteinases	0.999998	0.876685	0.999986	1	0.544709
Peptide chain elongation	0.999998	0.936791	1	1	0.00685408
Eukaryotic Translation Termination	0.999998	0.991887	1	1	0.00786076
Formation of a pool of free 40S subunits	0.999999	0.985863	1	1	0.00568764
Transport to the Golgi and subsequent modification	0.999999	0.99994	0.856293	0.660985	0.999996
Degradation of the extracellular matrix	1	0.849203	1	1	0.667615
Eukaryotic Translation Elongation	1	0.941992	1	1	0.007156
SRP-dependent cotranslational protein targeting to membrane	1	0.976828	1	1	0.0170242
Extracellular matrix organization	1	0.231435	1	1	0.983792
